# Supplementary material for: NHC-ligated indenyl- and fluorenyl-substituted Alanes and Gallanes: synthons towards indenyl- and fluorenyl-bridged (AlC)n-heterocycles (n = 2,3)
Source: Royal Society of Chemistry journal article supplement (doi:10.1039/d4dt00244j), 2024-01-01
Supplement: d4dt00244j1.pdf [file d4dt00244j1.pdf]

Electronic Supplementary Information for:  
**NHC-ligated Indenyl- and Fluorenyl-substituted Alanes and  
Gallanes: Synthons towards Indenyl- and Fluorenyl-bridged (AlC)<sub>n</sub>-  
heterocycles (n = 2,3)**

Luis Werner<sup>[a]</sup>, Julika Hagn,<sup>[a]</sup> Alexander Gerstner,<sup>[a]</sup> and Udo Radius<sup>[a]\*</sup>.

<sup>[a]</sup>Institut für Anorganische Chemie, Julius-Maximilians-Universität Würzburg, Am Hubland, 97074  
Würzburg, Germany.

Content:

|                                                      |    |
|------------------------------------------------------|----|
| 1) NMR spectra of compounds                          | 2  |
| 2) Thermal properties                                | 34 |
| 3) Crystal data collection and processing parameters | 37 |

## 1) NMR spectra of compounds

$(i\text{Pr}^{\text{Me}})\cdot\text{AlH}_2\text{Ind } \mathbf{1}$ :

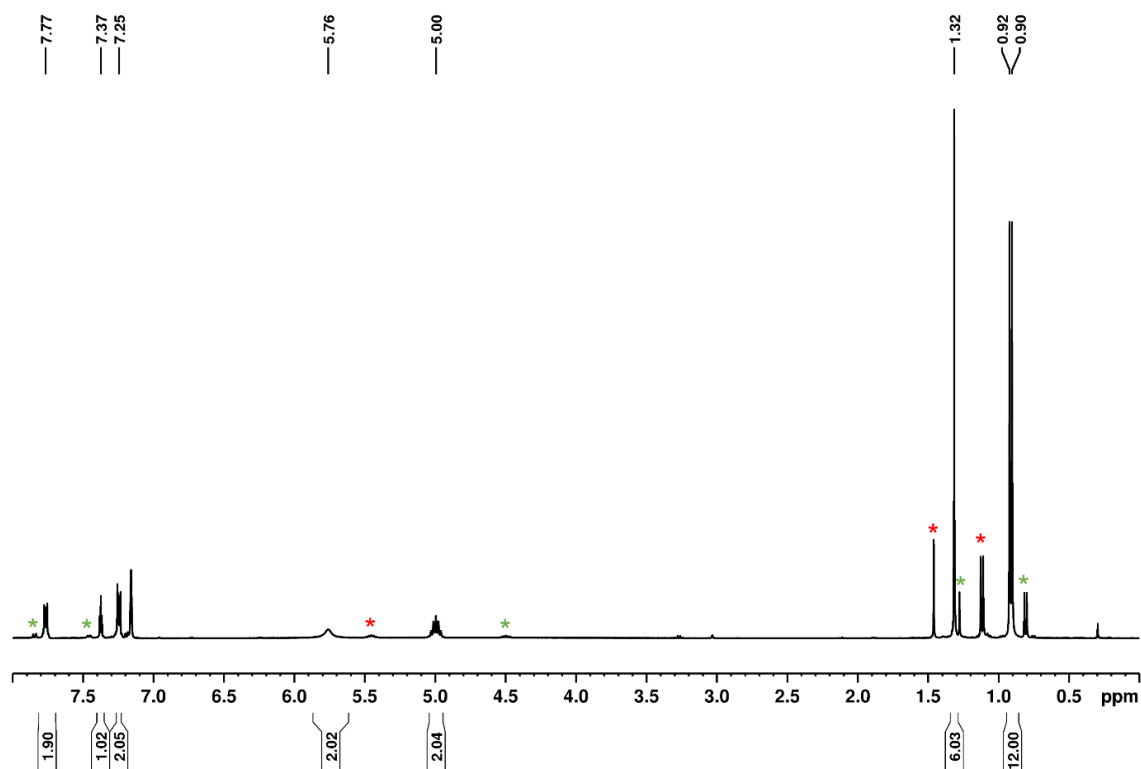

**Figure S1.**  $^1\text{H}$  NMR spectrum (400.1 MHz,  $\text{C}_6\text{D}_6$ , 298 K) of  $(i\text{Pr}^{\text{Me}})\cdot\text{AlH}_2\text{Ind } \mathbf{1}$  ( $(i\text{Pr}^{\text{Me}})\cdot\text{AlH}_3$  marked with red asterisks,  $(i\text{Pr}^{\text{Me}})\cdot\text{AlHInd}_2 \mathbf{13}$  marked with green asterisks).<sup>[S1]</sup>

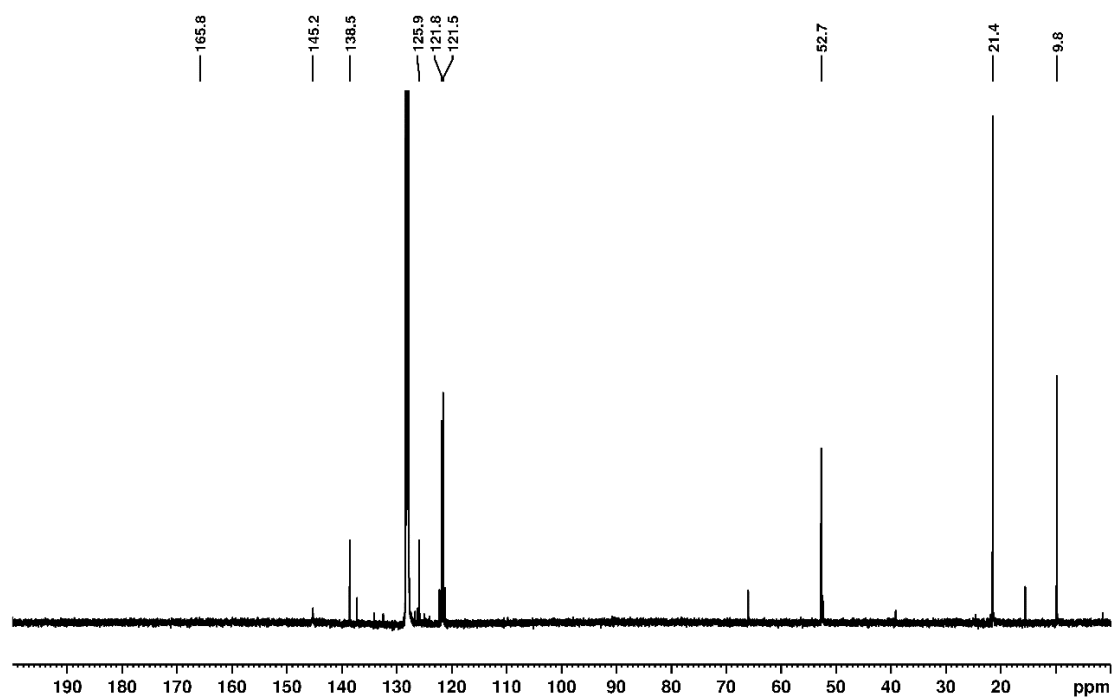

**Figure S2.**  $^{13}\text{C}$  NMR spectrum (100.6 MHz,  $\text{C}_6\text{D}_6$ , 298 K) of  $(i\text{Pr}^{\text{Me}})\cdot\text{AlH}_2\text{Ind } \mathbf{1}$ .

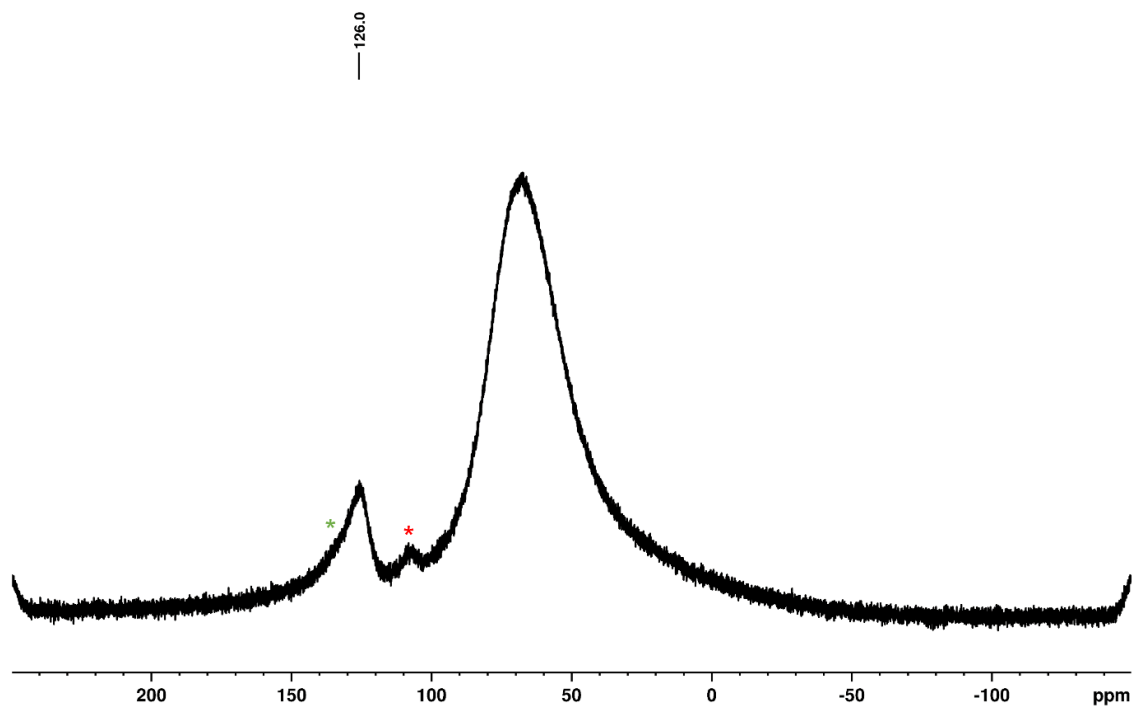

**Figure S3.**  $^{27}\text{Al}$  NMR spectrum (104.3 MHz,  $\text{C}_6\text{D}_6$ , 298 K) of  $(i\text{Pr}^{\text{Me}})_3\text{AlH}_2\text{Ind}$  **1** ( $(i\text{Pr}^{\text{Me}})_3\text{AlH}_3$  marked with red asterisks,  $(i\text{Pr}^{\text{Me}})_3\text{AlHInd}_2$  **13** marked with green asterisks).<sup>[S1]</sup>

$(i\text{Pr})_3\text{AlH}_2\text{Ind}$  **2**:

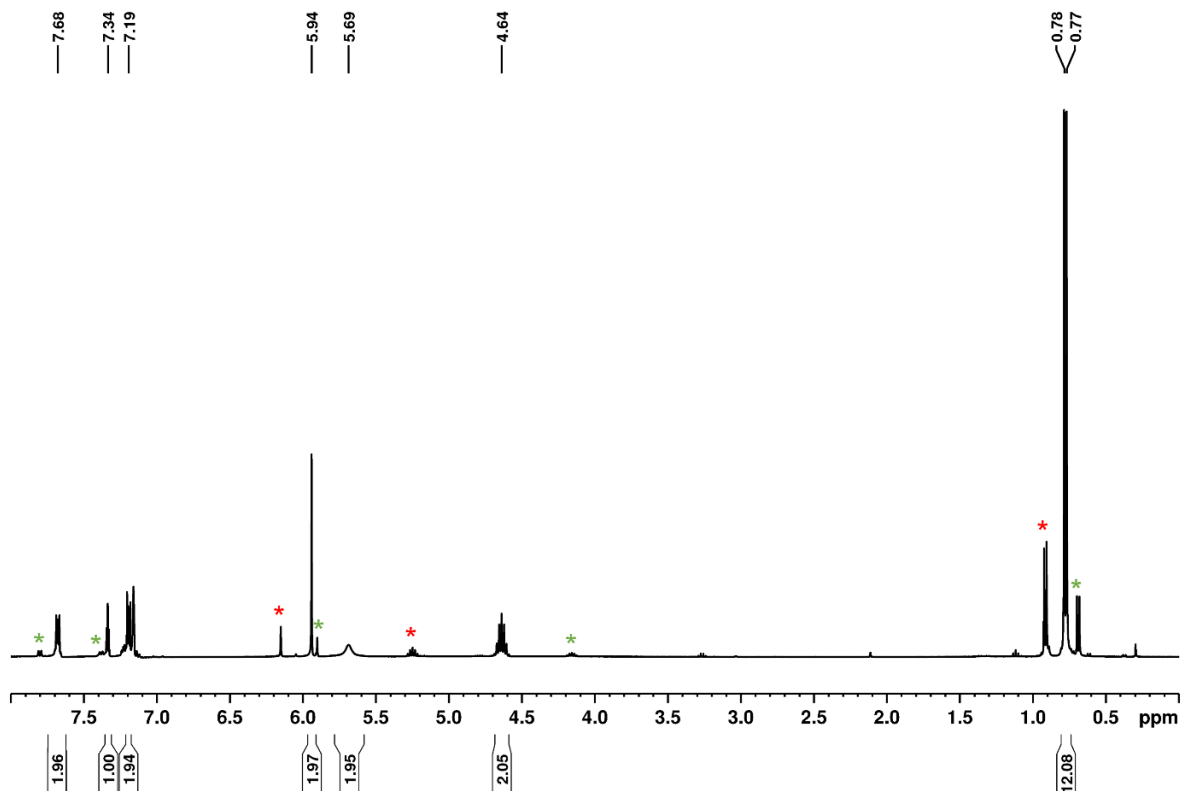

**Figure S4.**  $^1\text{H}$  NMR spectrum (400.1 MHz,  $\text{C}_6\text{D}_6$ , 298 K) of  $(i\text{Pr})_3\text{AlH}_2\text{Ind}$  **2** ( $(i\text{Pr})_3\text{AlH}_3$  marked with red asterisks,  $(i\text{Pr})_3\text{AlHInd}_2$  **14** marked with green asterisks).<sup>[S1]</sup>

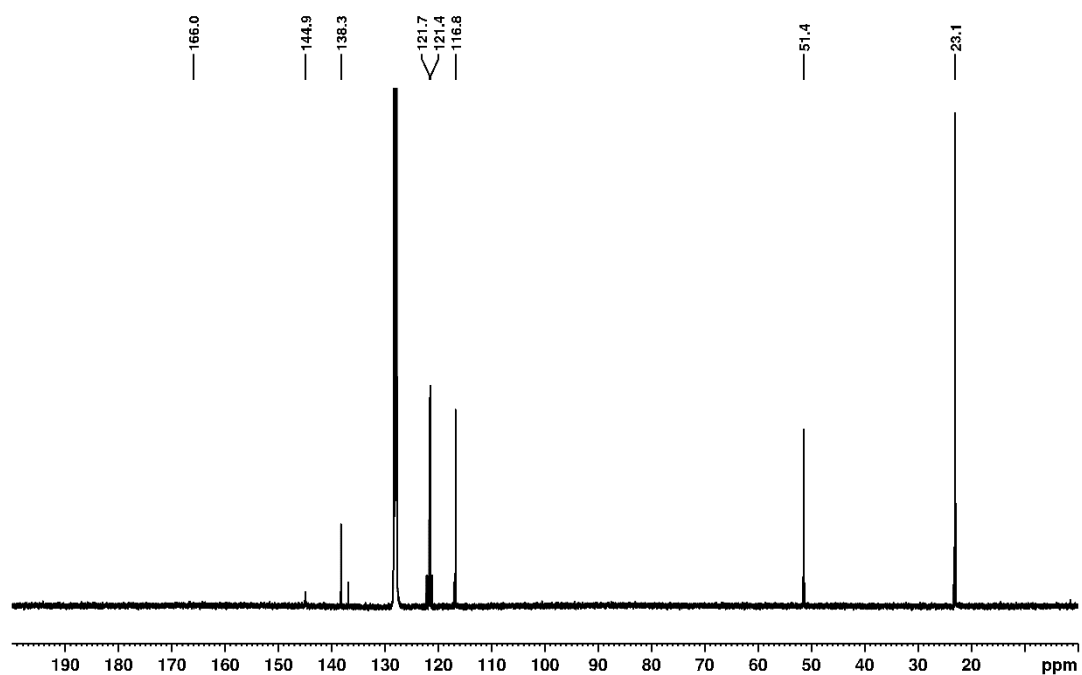

**Figure S5.**  $^{13}\text{C}$  NMR spectrum (100.6 MHz,  $\text{C}_6\text{D}_6$ , 298 K) of  $(\text{liPr})\cdot\text{AlH}_2\text{Ind } 2$ .

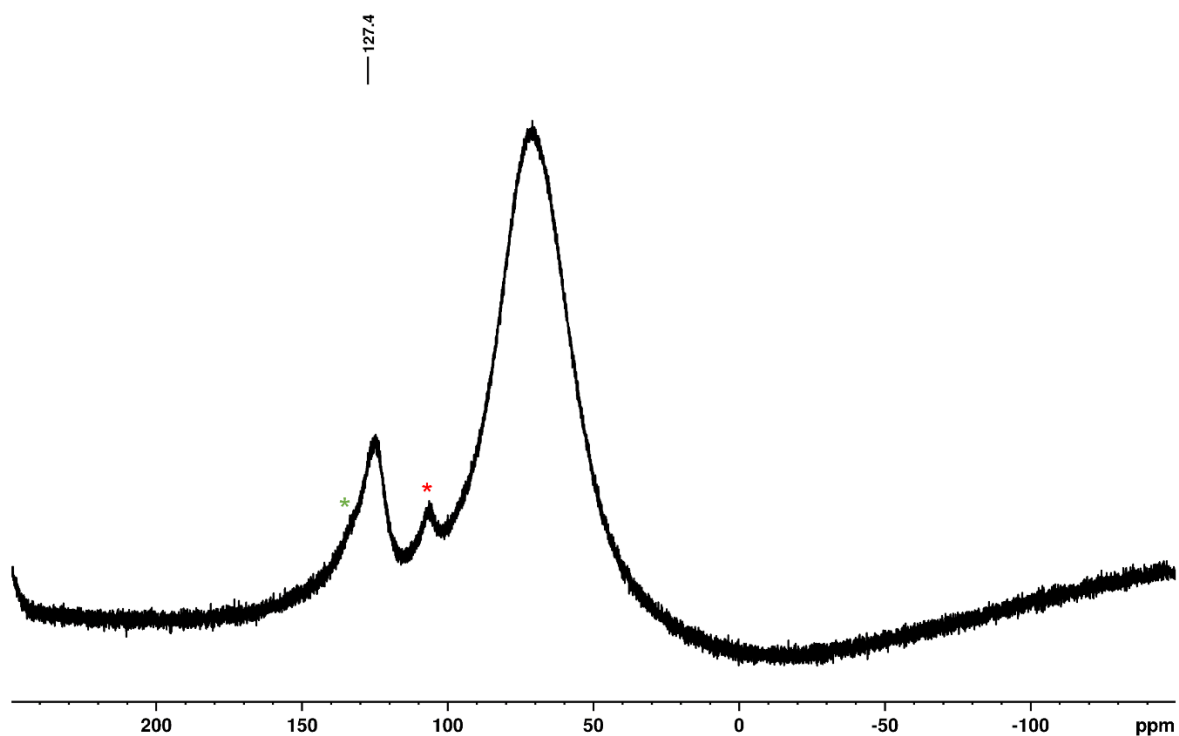

**Figure S6.**  $^{27}\text{Al}$  NMR spectrum (104.3 MHz,  $\text{C}_6\text{D}_6$ , 298 K) of  $(\text{liPr})\cdot\text{AlH}_2\text{Ind } 2$  ( $(\text{liPr})\cdot\text{AlH}_3$  marked with red asterisks,  $(\text{liPr})\cdot\text{AlHInd}_2 \mathbf{14}$  marked with green asterisks).<sup>[S1]</sup>

( $\text{IMe}^{\text{Me}}$ )- $\text{AlH}_2\text{Ind}$  **3**:

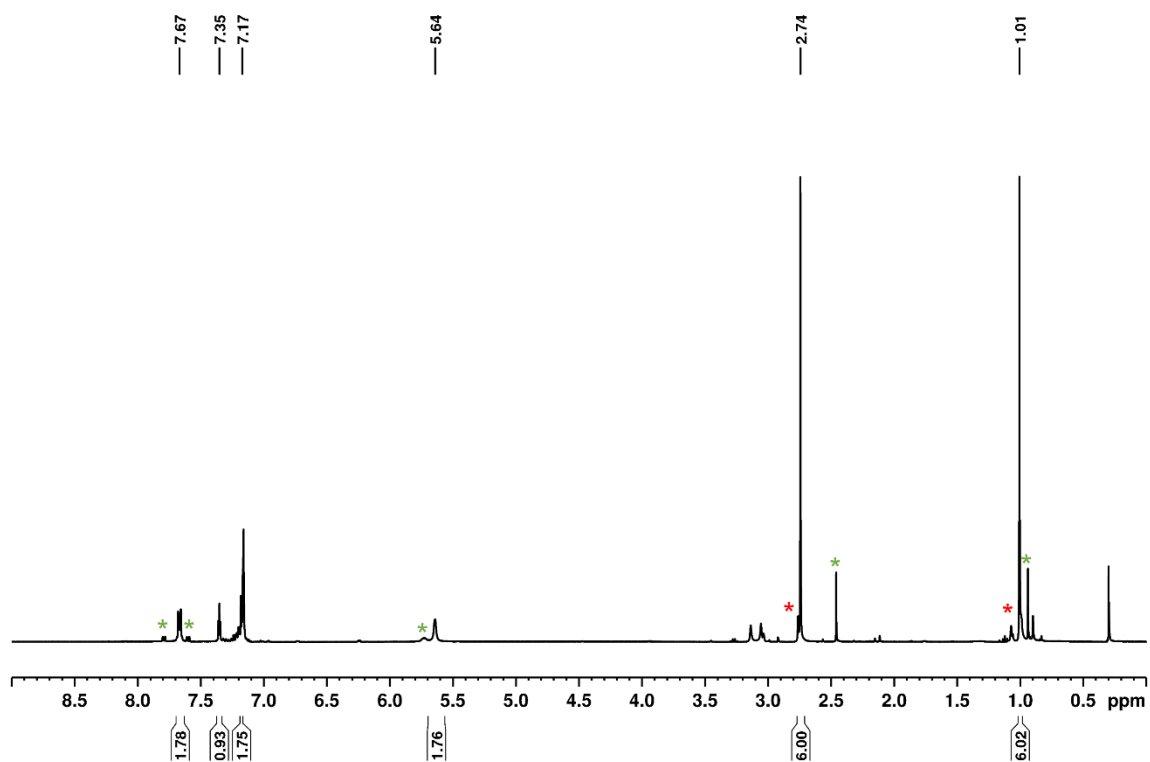

**Figure S7.**  $^1\text{H}$  NMR spectrum (400.1 MHz,  $\text{C}_6\text{D}_6$ , 298 K) of ( $\text{IMe}^{\text{Me}}$ )- $\text{AlH}_2\text{Ind}$  **3** (( $\text{IMe}^{\text{Me}}$ )- $\text{AlH}_3$  marked with red asterisks, ( $\text{IMe}^{\text{Me}}$ )- $\text{AlHInd}_2$  **15** marked with green asterisks).<sup>[S1]</sup>

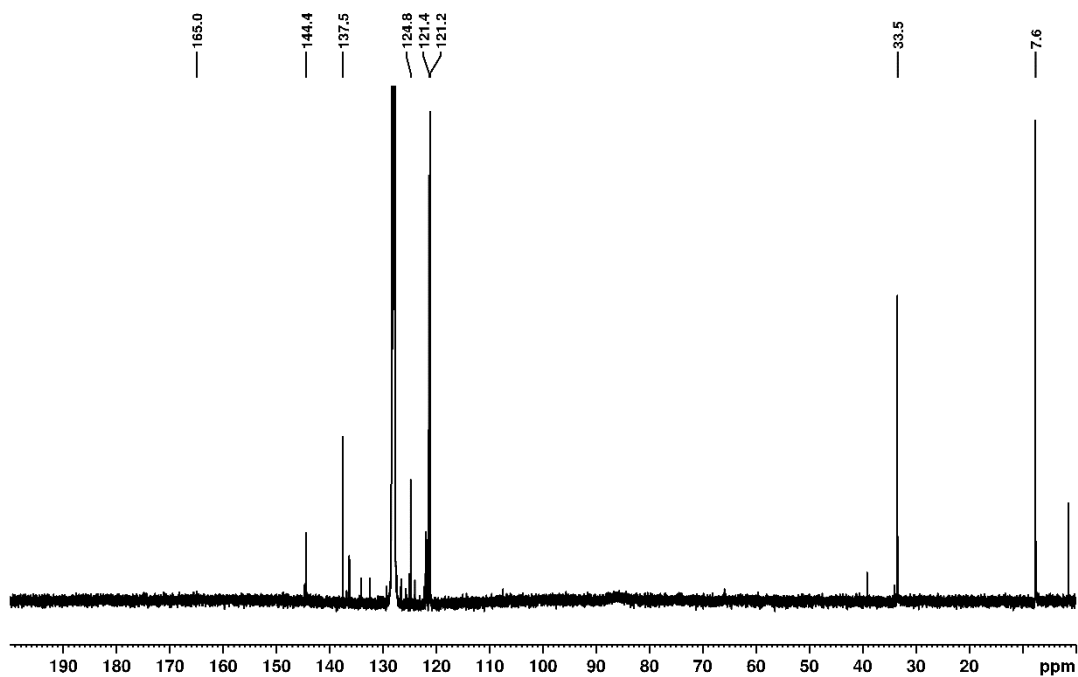

**Figure S8.**  $^{13}\text{C}$  NMR spectrum (100.6 MHz,  $\text{C}_6\text{D}_6$ , 298 K) of ( $\text{IMe}^{\text{Me}}$ )- $\text{AlH}_2\text{Ind}$  **3**.

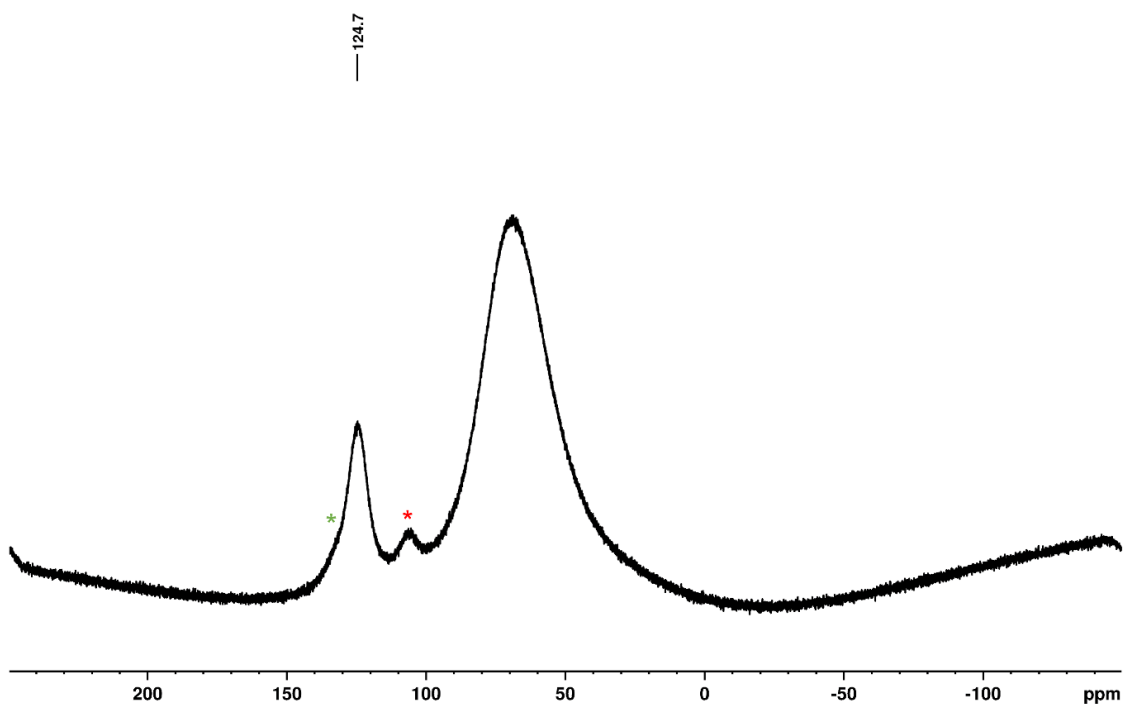

**Figure S9.**  $^{27}\text{Al}$  NMR spectrum (104.3 MHz,  $\text{C}_6\text{D}_6$ , 298 K) of  $(\text{iMe}^{\text{Me}})\cdot\text{AlH}_2\text{Ind } \mathbf{3}$  ( $(\text{iMe}^{\text{Me}})\cdot\text{AlH}_3$  marked with red asterisks,  $(\text{iMe}^{\text{Me}})\cdot\text{AlHInd}_2 \mathbf{15}$  marked with green asterisks).<sup>[S1]</sup>

$(\text{iPr}^{\text{Me}})\cdot\text{AlH}_2\text{FI } \mathbf{4}$ :

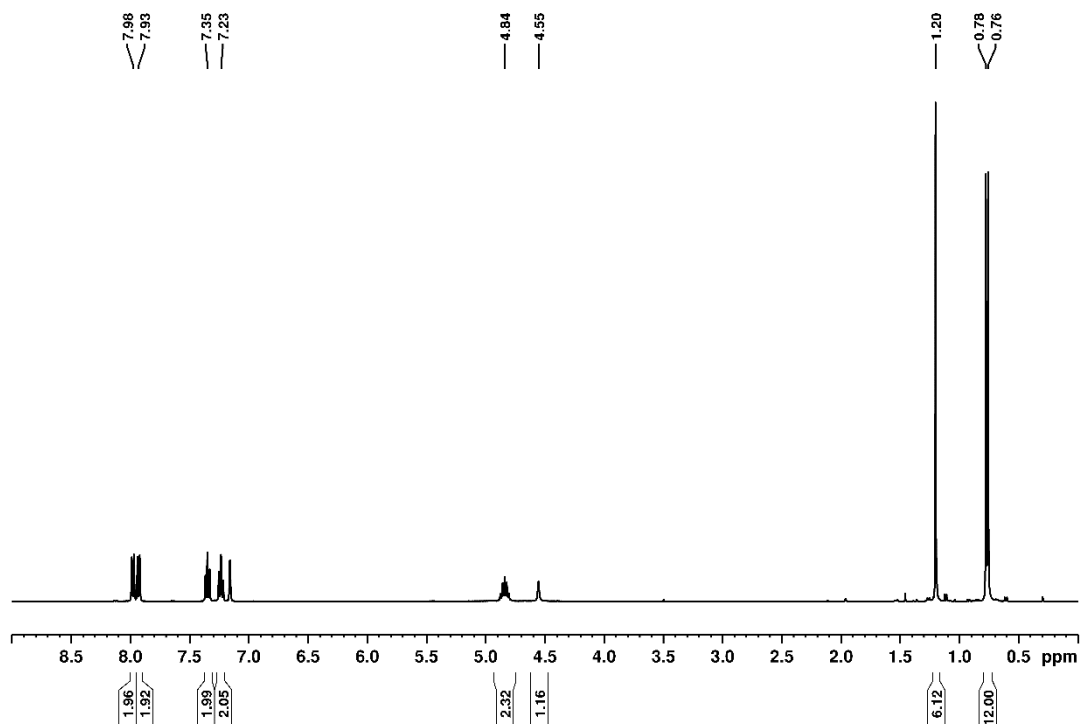

**Figure S10.**  $^1\text{H}$  NMR spectrum (400.1 MHz,  $\text{C}_6\text{D}_6$ , 298 K) of  $(\text{iPr}^{\text{Me}})\cdot\text{AlH}_2\text{FI } \mathbf{4}$ .

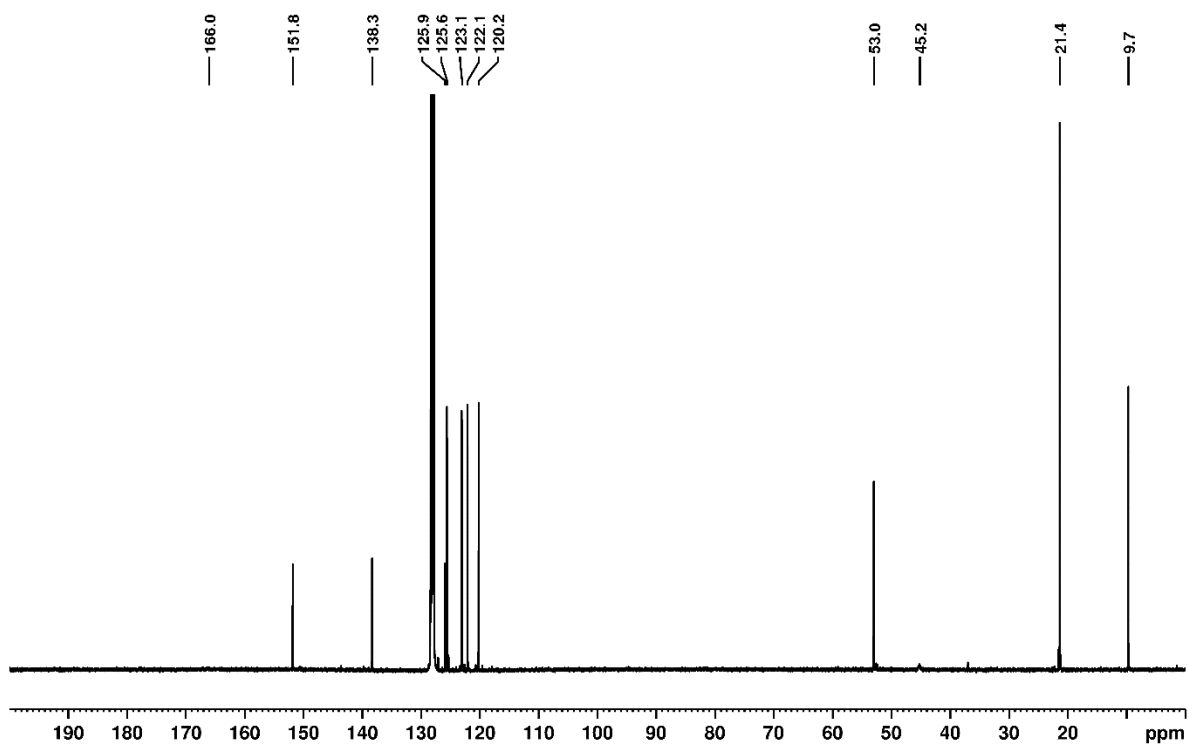

**Figure S11.**  $^{13}\text{C}$  NMR spectrum (100.6 MHz,  $\text{C}_6\text{D}_6$ , 298 K) of  $(i\text{Pr}^{\text{Me}})\text{-AlH}_2\text{FI}$  **4**.

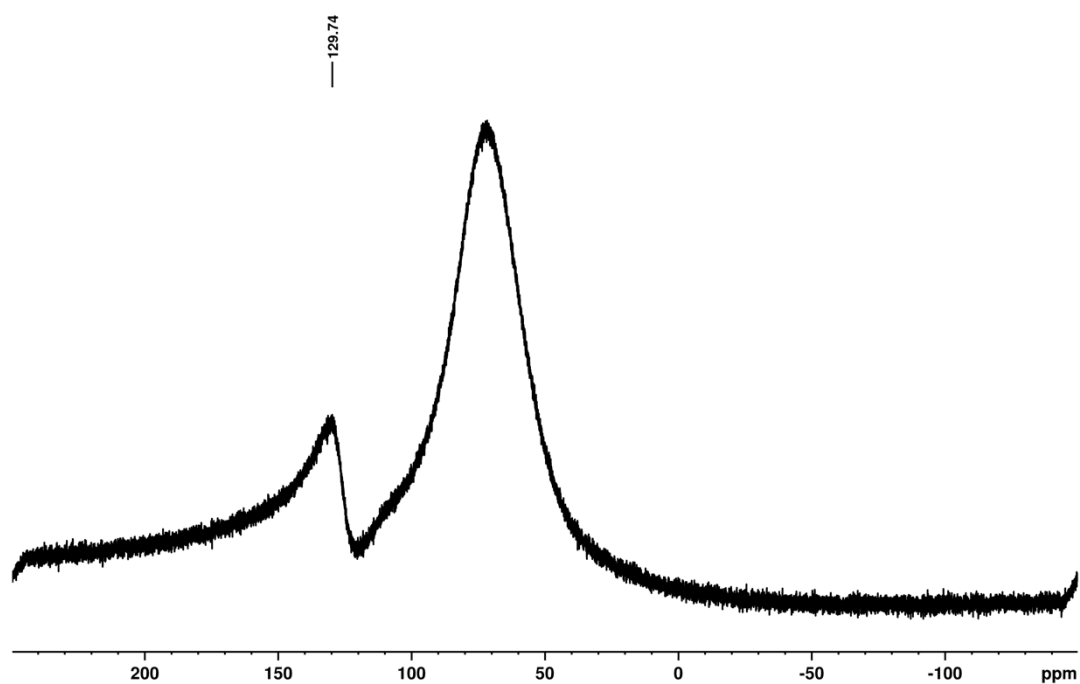

**Figure S12.**  $^{27}\text{Al}$  NMR spectrum (104.3 MHz,  $\text{C}_6\text{D}_6$ , 298 K) of  $(i\text{Pr}^{\text{Me}})\text{-AlH}_2\text{FI}$  **4**.

(*l*iPr)·AlH<sub>2</sub>FI 5:

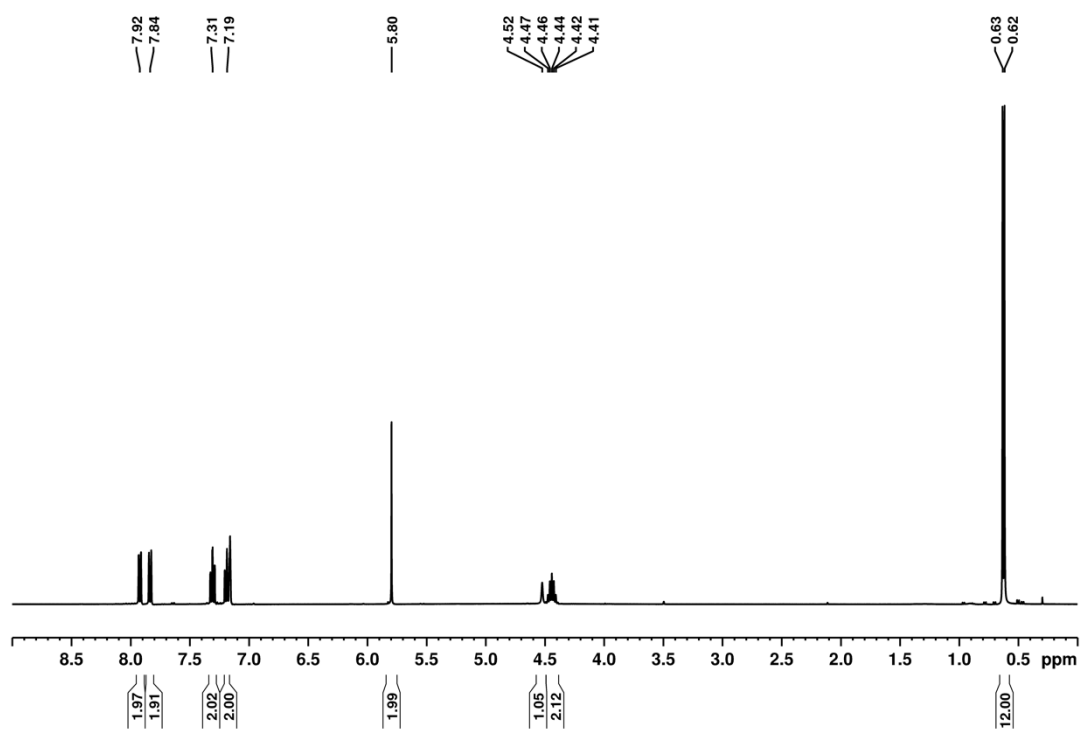

Figure S13. <sup>1</sup>H NMR spectrum (400.1 MHz, C<sub>6</sub>D<sub>6</sub>, 298 K) of (*l*iPr)·AlH<sub>2</sub>FI 5.

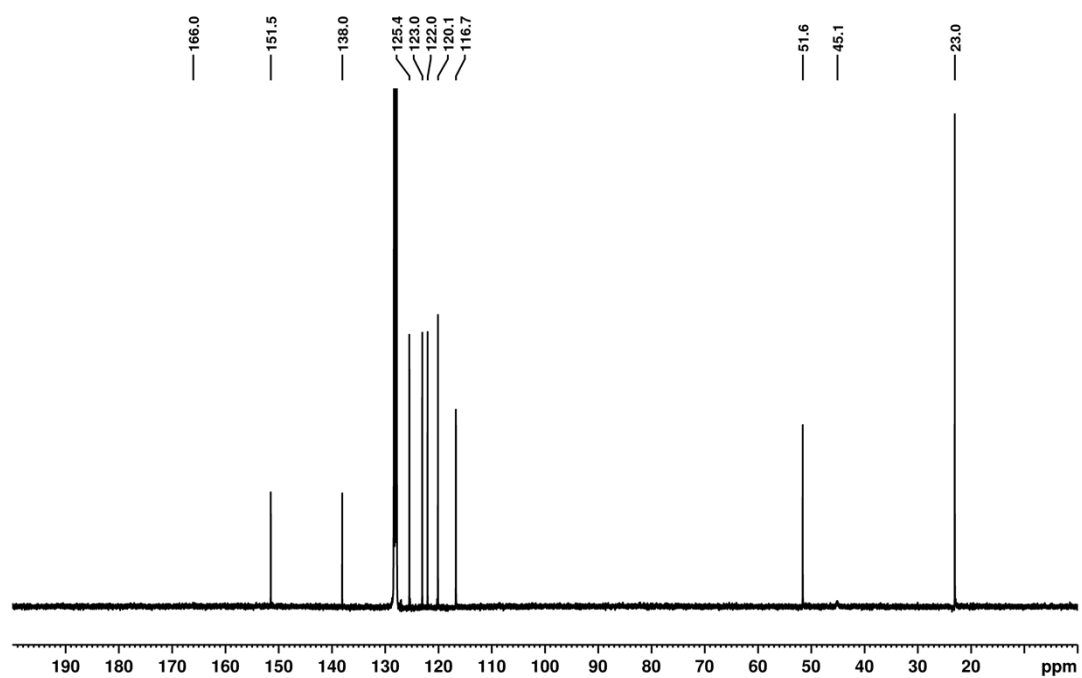

Figure S14. <sup>13</sup>C NMR spectrum (100.6 MHz, C<sub>6</sub>D<sub>6</sub>, 298 K) of (*l*iPr)·AlH<sub>2</sub>FI 5.



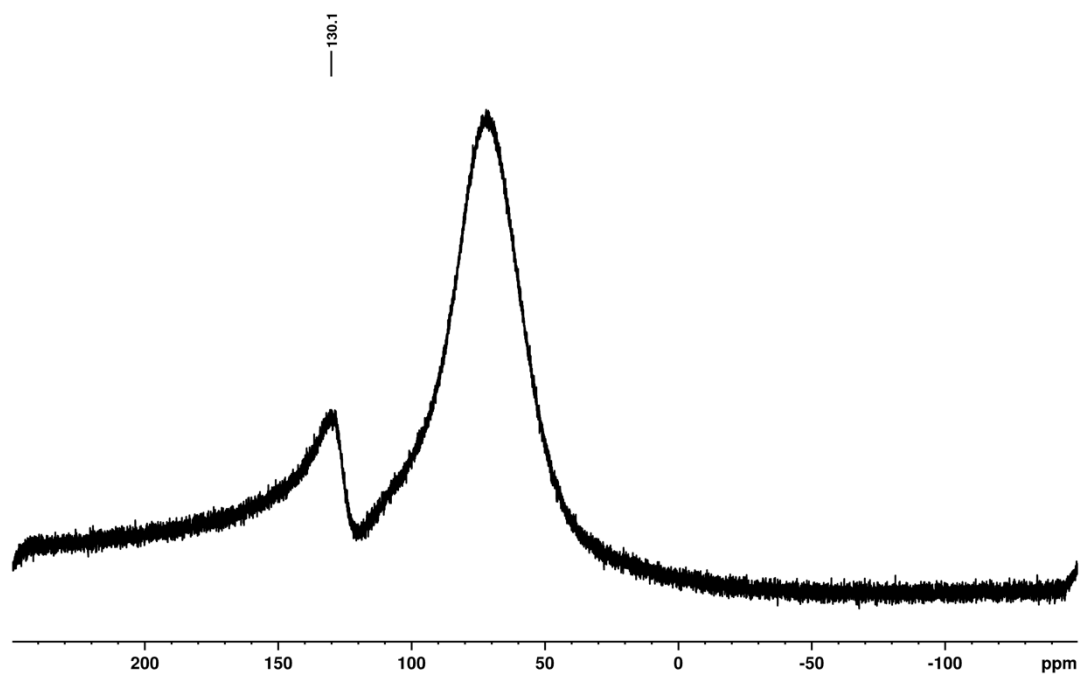

**Figure S15.**  $^{27}\text{Al}$  NMR spectrum (104.3 MHz,  $\text{C}_6\text{D}_6$ , 298 K) of  $(\text{IiPr})\cdot\text{AlH}_2\text{FI}$  **5**.

$(\text{IMe}^{\text{Me}})\cdot\text{AlH}_2\text{FI}$  **6**:

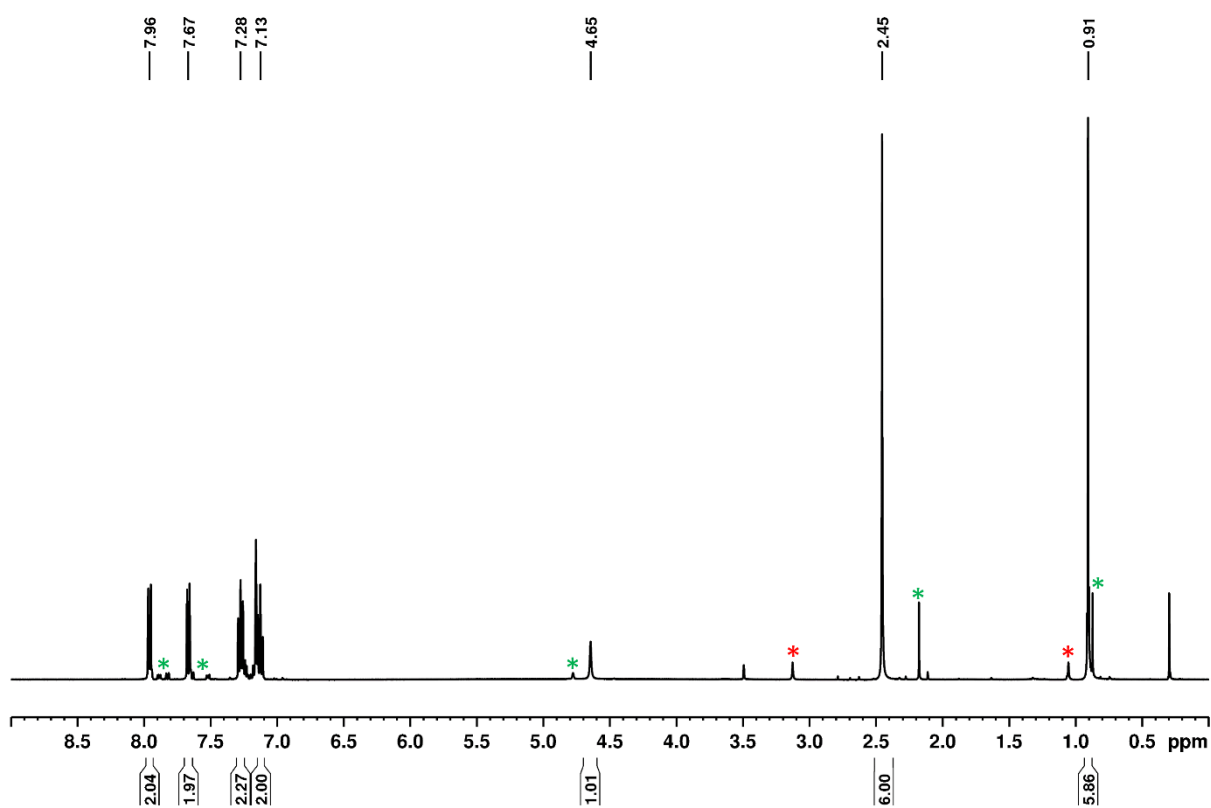

**Figure S16.**  $^1\text{H}$  NMR spectrum (400.1 MHz,  $\text{C}_6\text{D}_6$ , 298 K) of  $(\text{IMe}^{\text{Me}})\cdot\text{AlH}_2\text{FI}$  **6** ( $(\text{IMe}^{\text{Me}})\cdot\text{AlH}_3$  marked with red asterisks,  $(\text{IMe}^{\text{Me}})\cdot\text{AlHF}_2$  **18** marked with green asterisks).

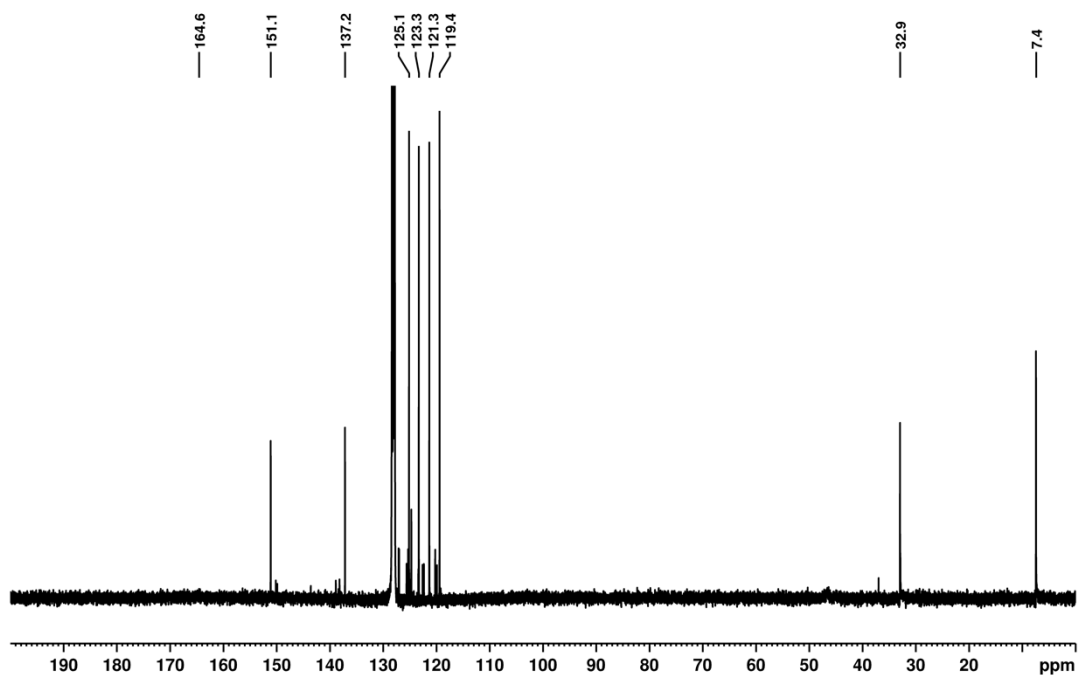

**Figure S17.**  $^{13}\text{C}$  NMR spectrum (100.6 MHz,  $\text{C}_6\text{D}_6$ , 298 K) of  $(\text{IMe}^{\text{Me}})\text{-AlH}_2\text{FI}$  **6**.

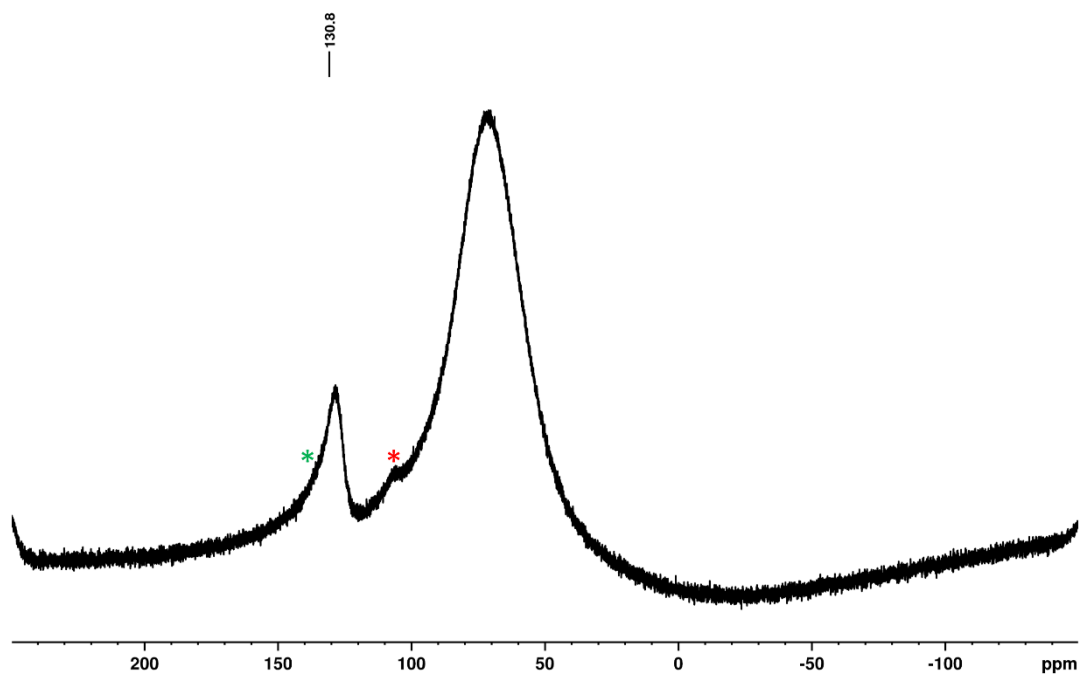

**Figure S18.**  $^{27}\text{Al}$  NMR spectrum (104.3 MHz,  $\text{C}_6\text{D}_6$ , 298 K) of  $(\text{IMe}^{\text{Me}})\text{-AlH}_2\text{FI}$  **6** ( $(\text{IMe}^{\text{Me}})\text{-AlH}_3$  marked with red asterisks,  $(\text{IMe}^{\text{Me}})\text{-AlHF}_2$  **18** marked with green asterisks).

(*liPr*<sup>Me</sup>)-GaH<sub>2</sub>Ind **7**:

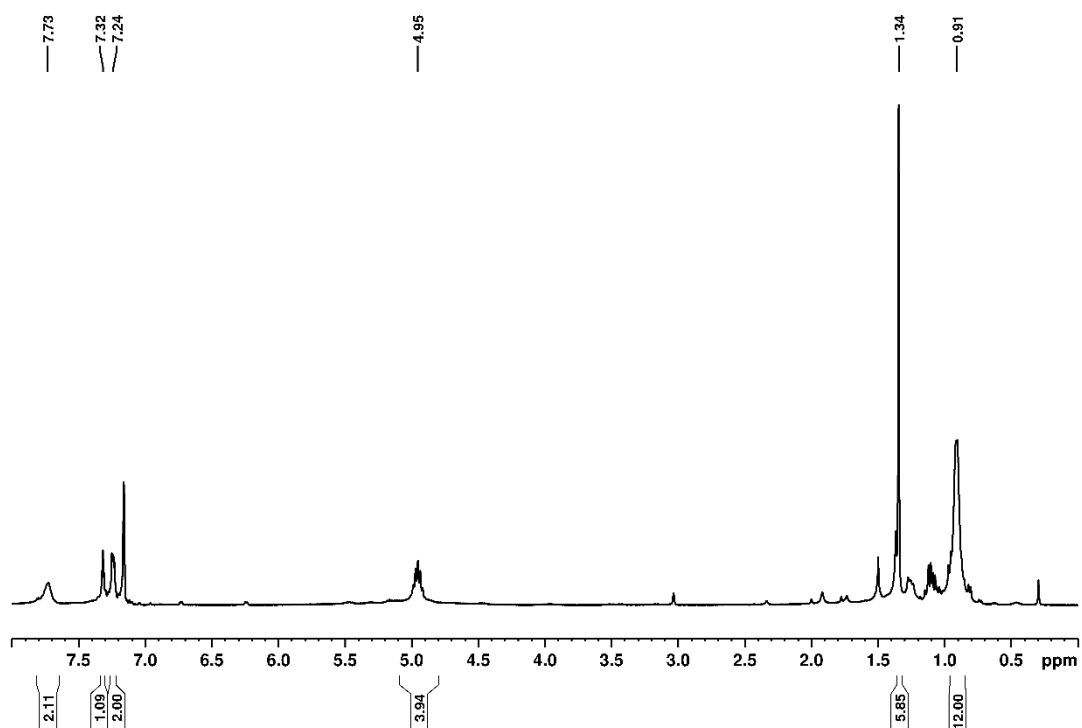

**Figure S19.** <sup>1</sup>H NMR spectrum (400.1 MHz, C<sub>6</sub>D<sub>6</sub>, 298 K) of (*liPr*<sup>Me</sup>)-GaH<sub>2</sub>Ind **7** (unmarked signals belong to unknown impurities).

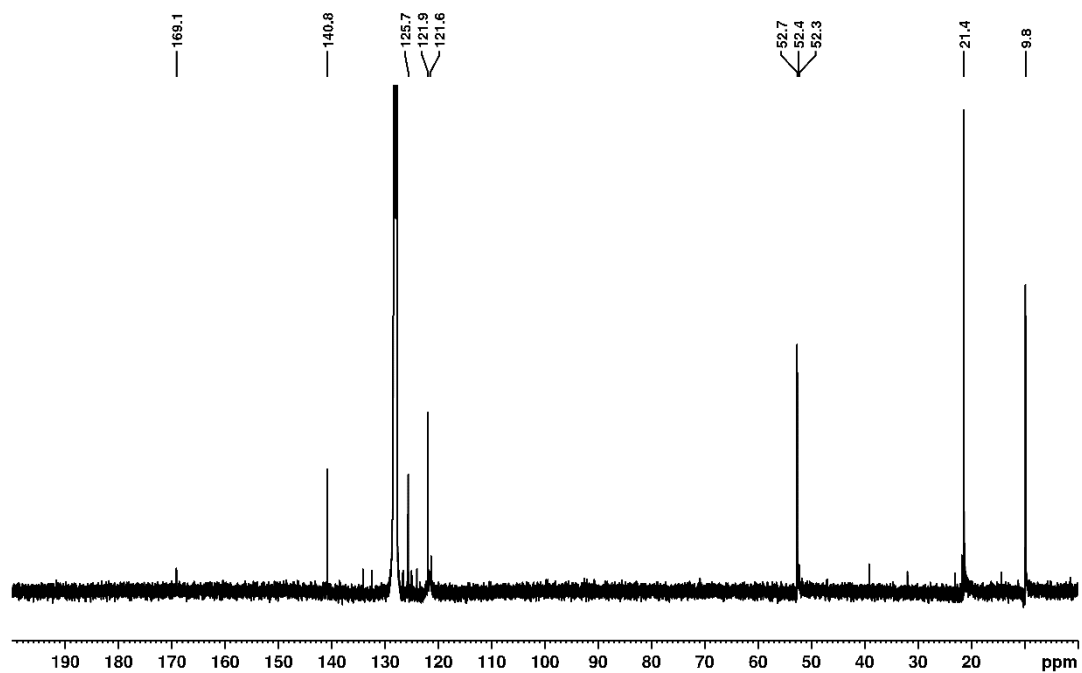

**Figure S20.** <sup>13</sup>C NMR spectrum (100.6 MHz, C<sub>6</sub>D<sub>6</sub>, 298 K) of (*liPr*<sup>Me</sup>)-GaH<sub>2</sub>Ind **7**.

(*liPr*)-GaH<sub>2</sub>Ind **8**:

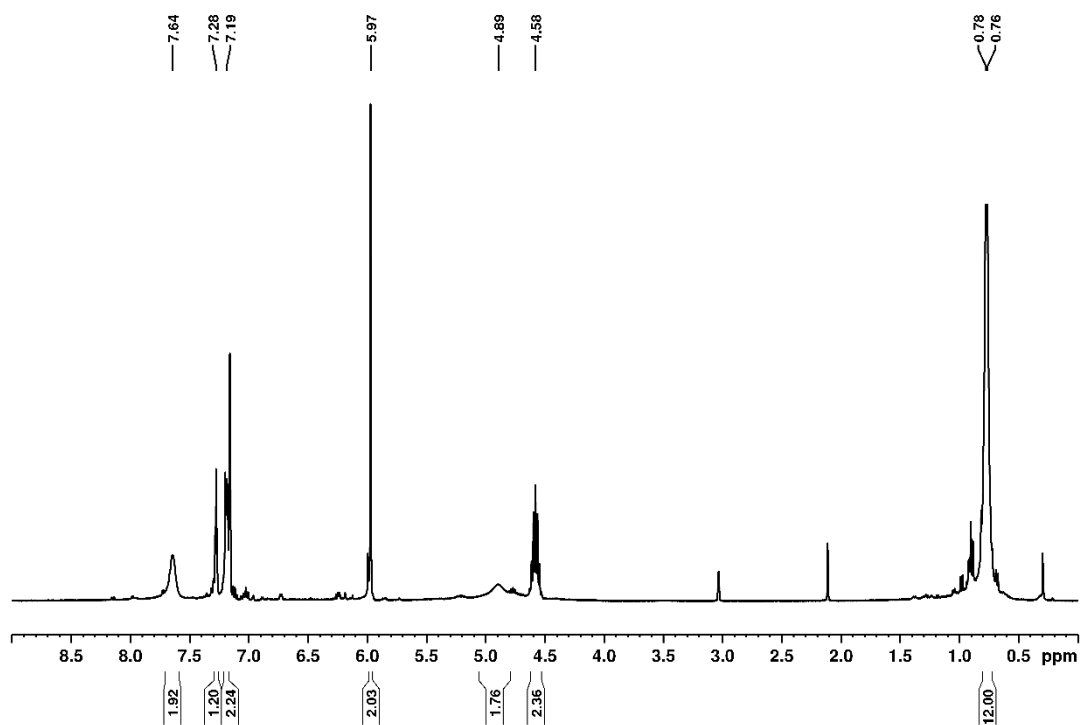

**Figure S21.**  $^1\text{H}$  NMR spectrum (400.1 MHz,  $\text{C}_6\text{D}_6$ , 298 K) of  $(i\text{Pr})\text{-GaH}_2\text{Ind}$  **8** (unmarked signals belong to unknown impurities).

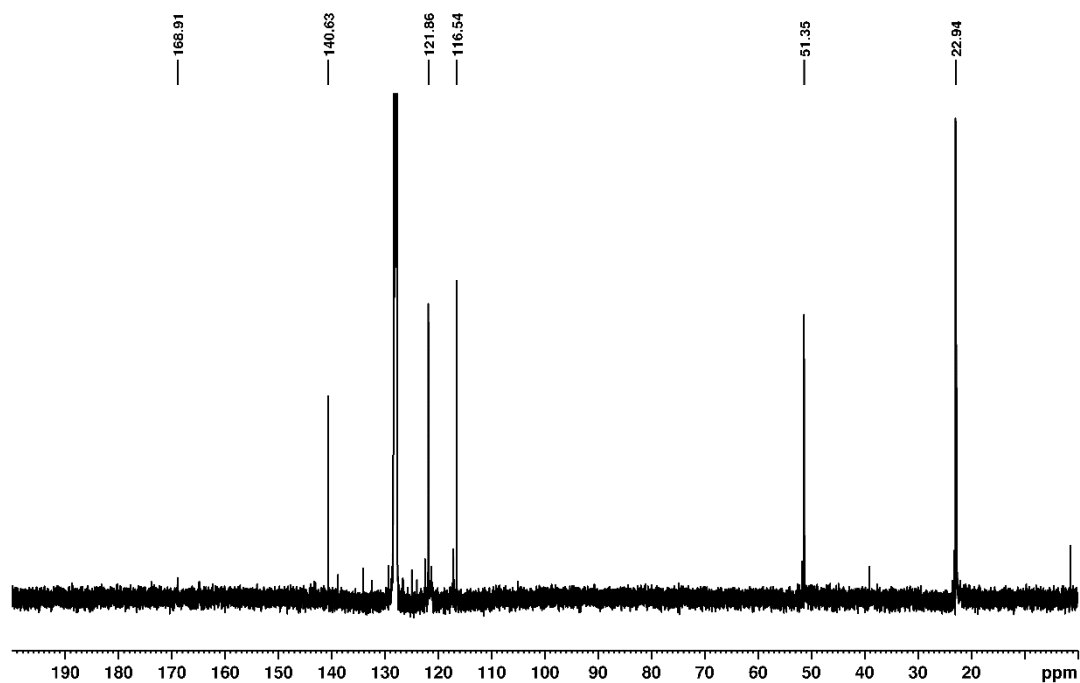

**Figure S22.**  $^{13}\text{C}$  NMR spectrum (100.6 MHz,  $\text{C}_6\text{D}_6$ , 298 K) of  $(i\text{Pr})\text{-GaH}_2\text{Ind}$  **8**.

(IMe<sup>Me</sup>)-GaH<sub>2</sub>Ind **9**:

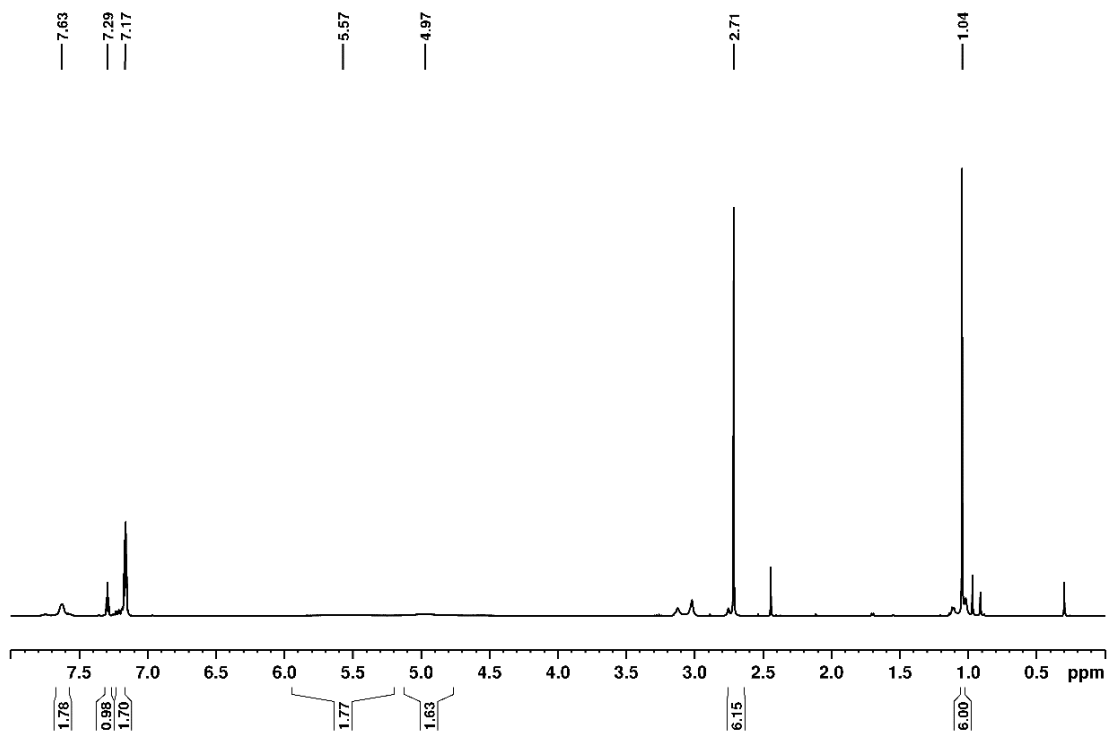

**Figure S23.** <sup>1</sup>H NMR spectrum (400.1 MHz, C<sub>6</sub>D<sub>6</sub>, 298 K) of (IMe<sup>Me</sup>)-GaH<sub>2</sub>Ind **9** (unmarked signals belong to unknown impurities).

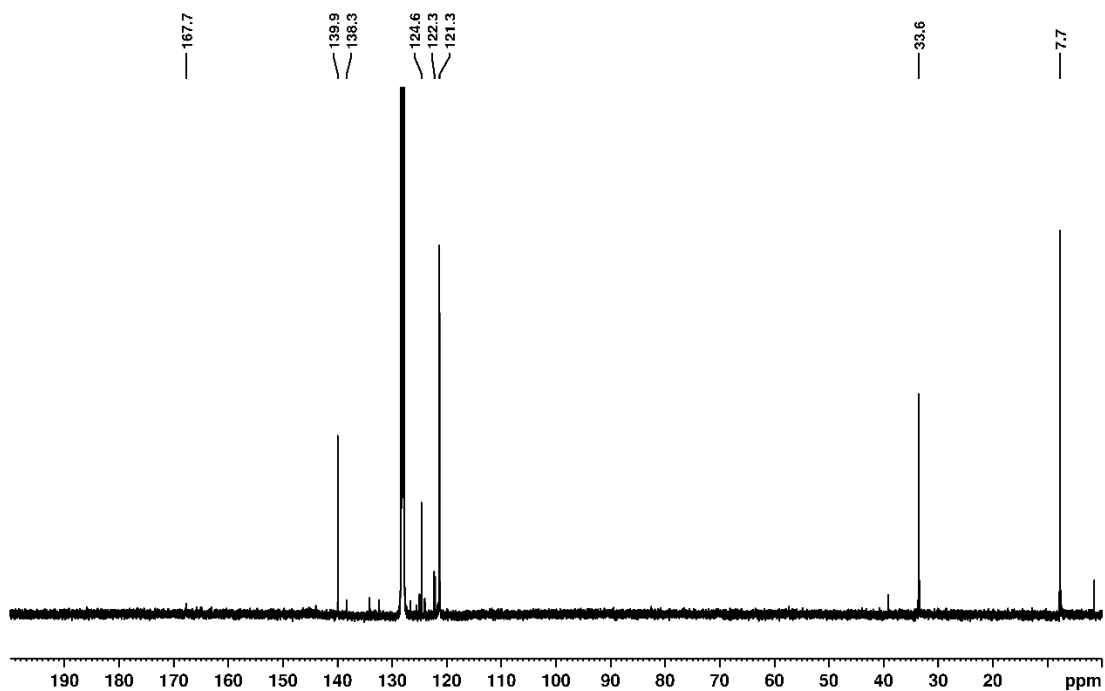

**Figure S24.** <sup>13</sup>C NMR spectrum (100.6 MHz, C<sub>6</sub>D<sub>6</sub>, 298 K) of (IMe<sup>Me</sup>)-GaH<sub>2</sub>Ind **9**.

(*liPr*<sup>Me</sup>)-GaH<sub>2</sub>FI **10**:

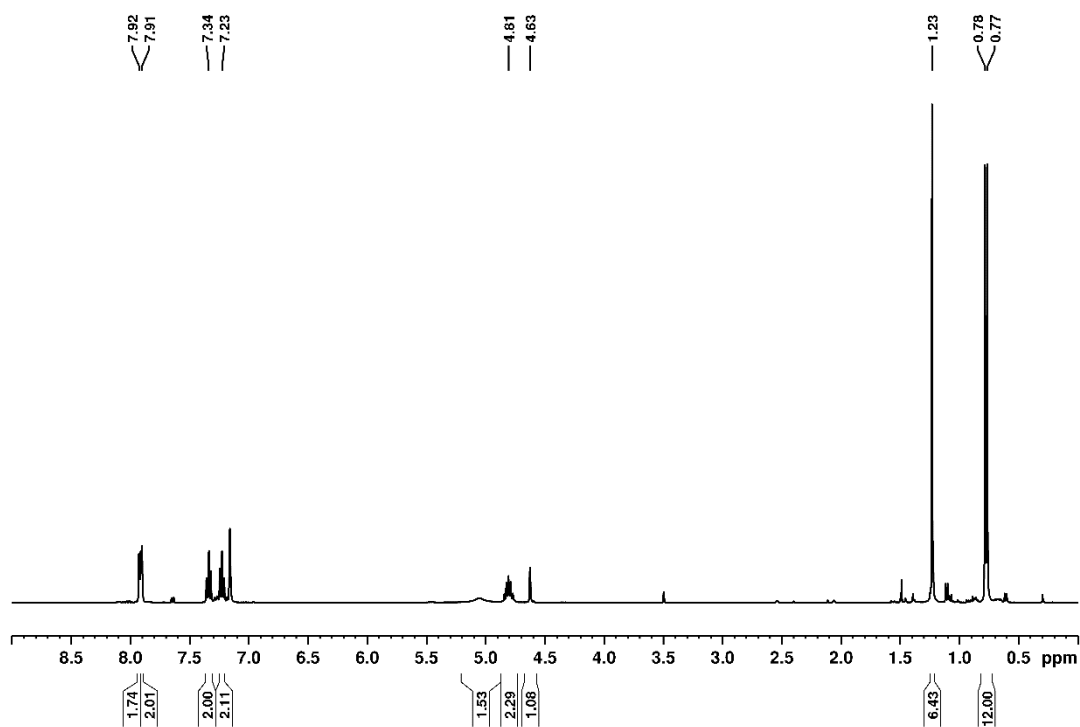

Figure S25. <sup>1</sup>H NMR spectrum (400.1 MHz, C<sub>6</sub>D<sub>6</sub>, 298 K) of (*liPr*<sup>Me</sup>)-GaH<sub>2</sub>FI **10**.

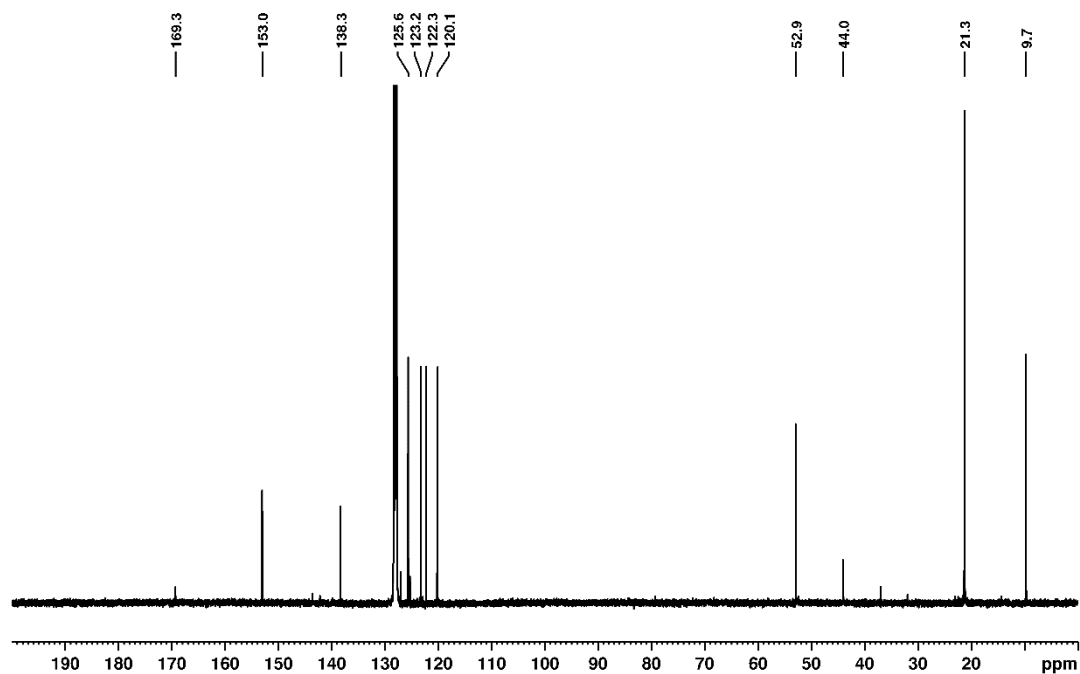

Figure S26. <sup>13</sup>C NMR spectrum (100.6 MHz, C<sub>6</sub>D<sub>6</sub>, 298 K) of (*liPr*<sup>Me</sup>)-GaH<sub>2</sub>FI **10**.

(*liPr*)-GaH<sub>2</sub>FI **11**:

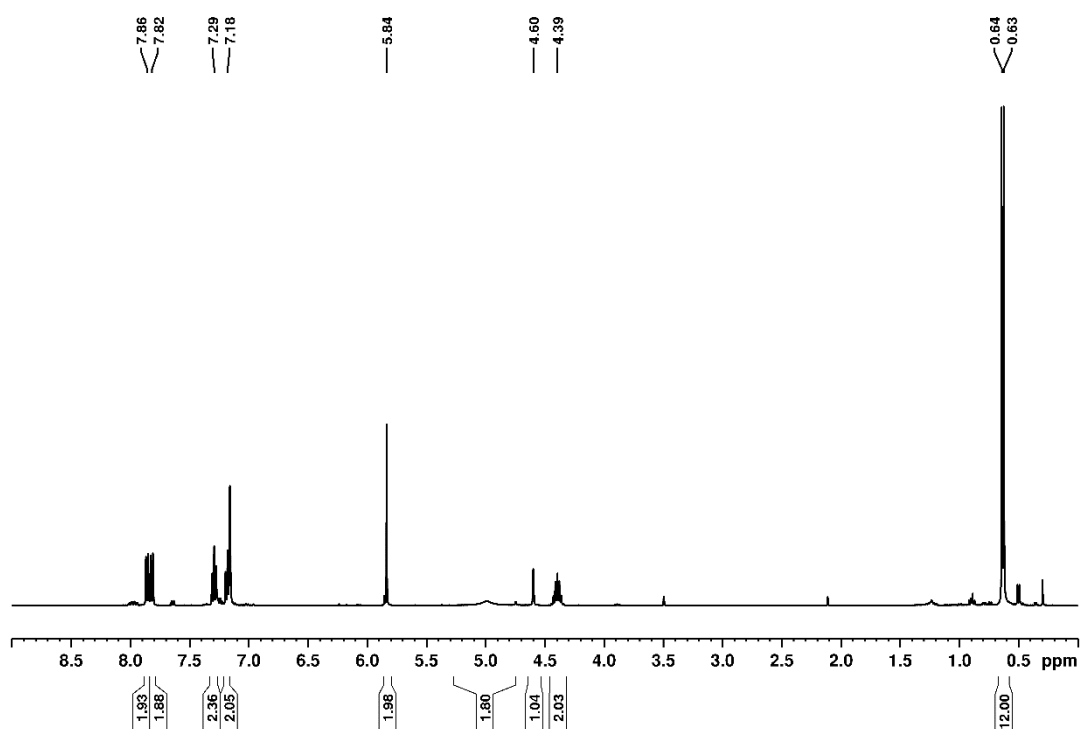

Figure S27. <sup>1</sup>H NMR spectrum (400.1 MHz, C<sub>6</sub>D<sub>6</sub>, 298 K) of (*liPr*)-GaH<sub>2</sub>FI **11**.

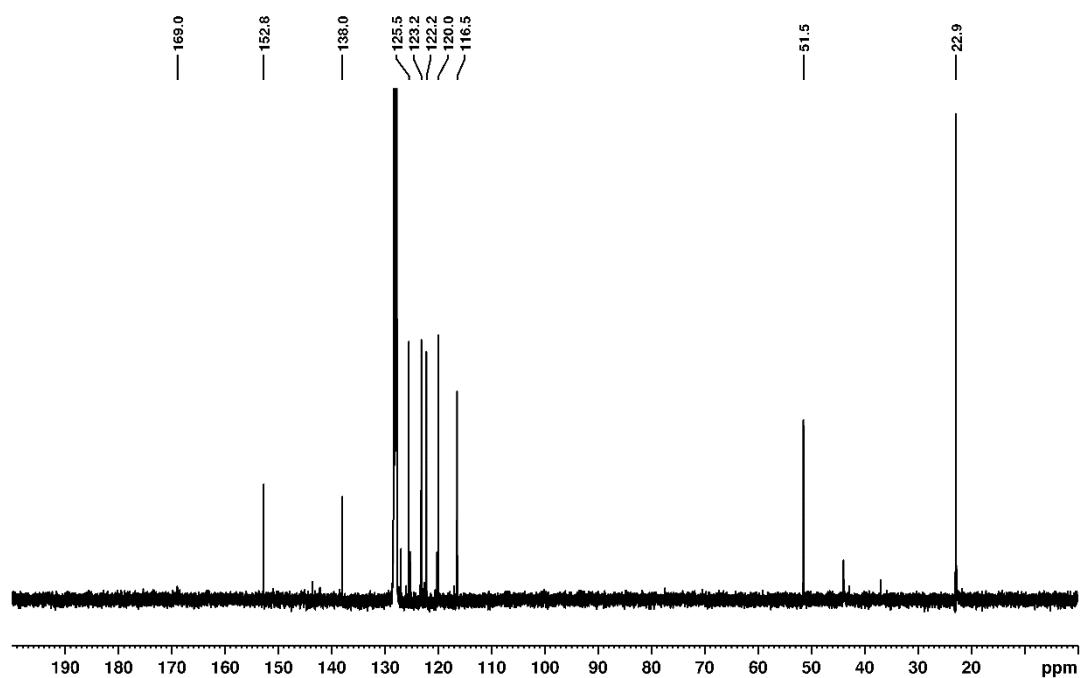

Figure S28. <sup>13</sup>C NMR spectrum (100.6 MHz, C<sub>6</sub>D<sub>6</sub>, 298 K) of (*liPr*)-GaH<sub>2</sub>FI **11**.

( $\text{IMe}^{\text{Me}}$ )- $\text{GaH}_2\text{FI}$  **12**:

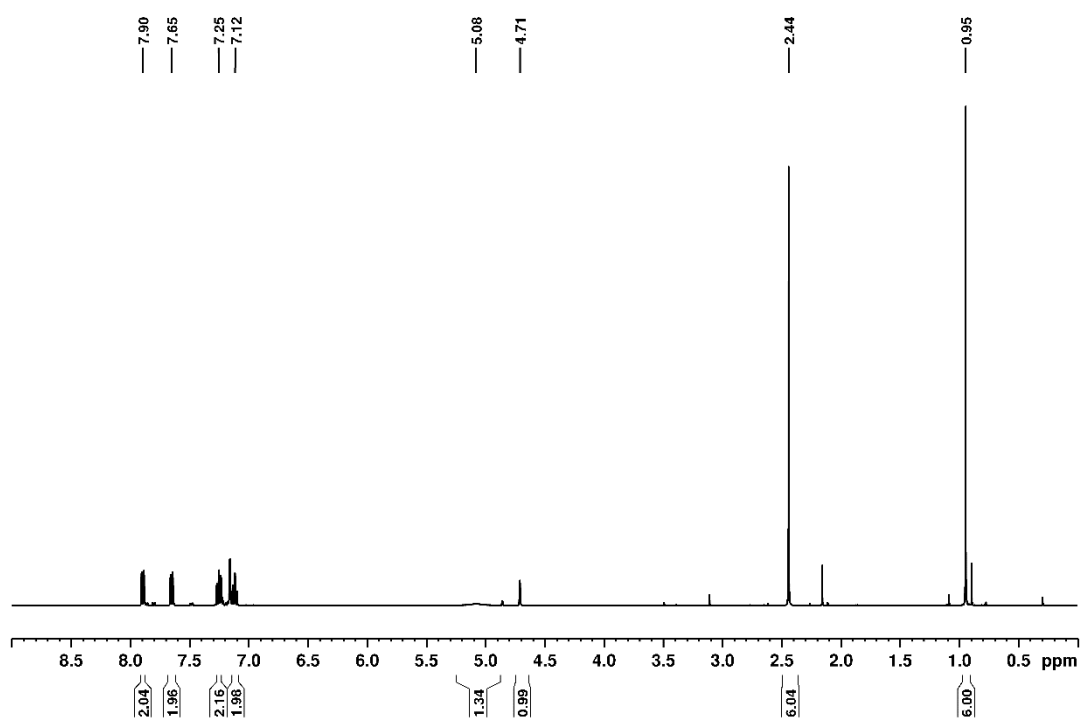

Figure S29.  $^1\text{H}$  NMR spectrum (400.1 MHz,  $\text{C}_6\text{D}_6$ , 298 K) of ( $\text{IMe}^{\text{Me}}$ )- $\text{GaH}_2\text{FI}$  **12**.

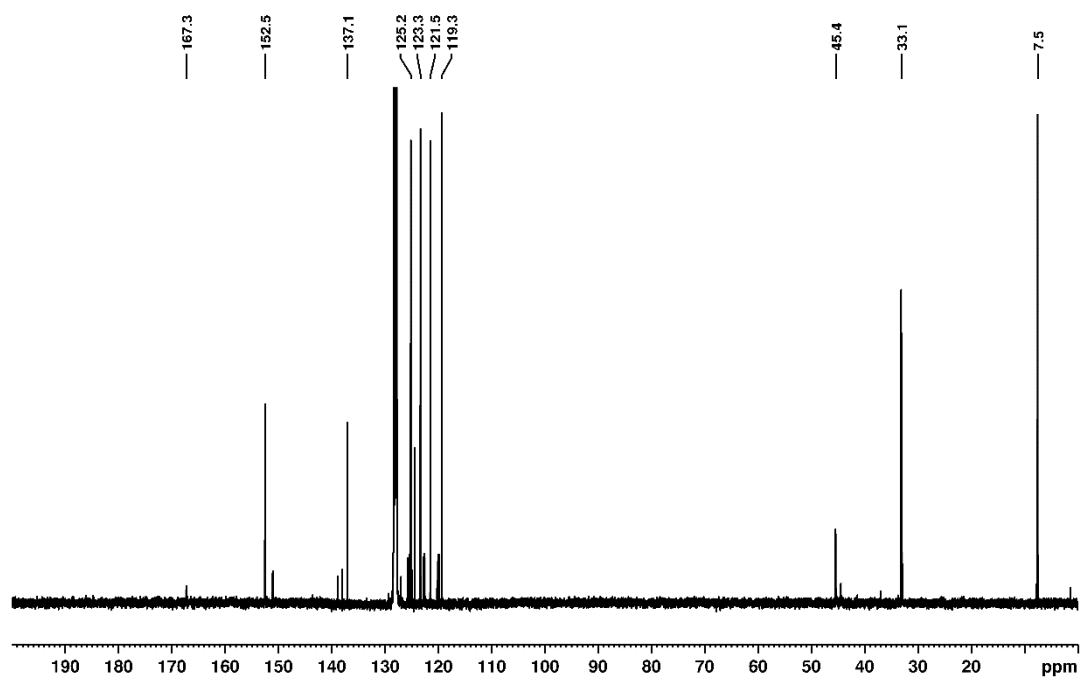

Figure S30.  $^{13}\text{C}$  NMR spectrum (100.6 MHz,  $\text{C}_6\text{D}_6$ , 298 K) of ( $\text{IMe}^{\text{Me}}$ )- $\text{GaH}_2\text{FI}$  **12**.



(*i*Pr<sup>Me</sup>)<sub>2</sub>AlHInd<sub>2</sub> **13**:

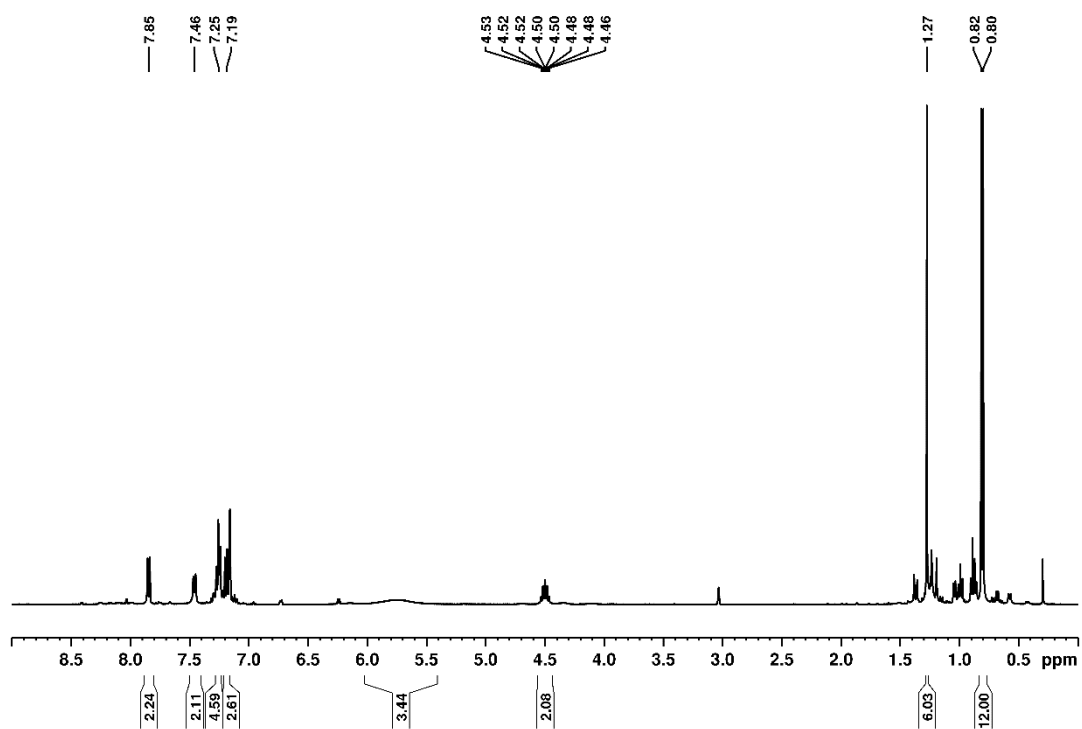

Figure S31. <sup>1</sup>H NMR spectrum (400.1 MHz, C<sub>6</sub>D<sub>6</sub>, 298 K) of (*i*Pr<sup>Me</sup>)<sub>2</sub>AlHInd<sub>2</sub> **13** (unmarked signals belong to unknown impurities).

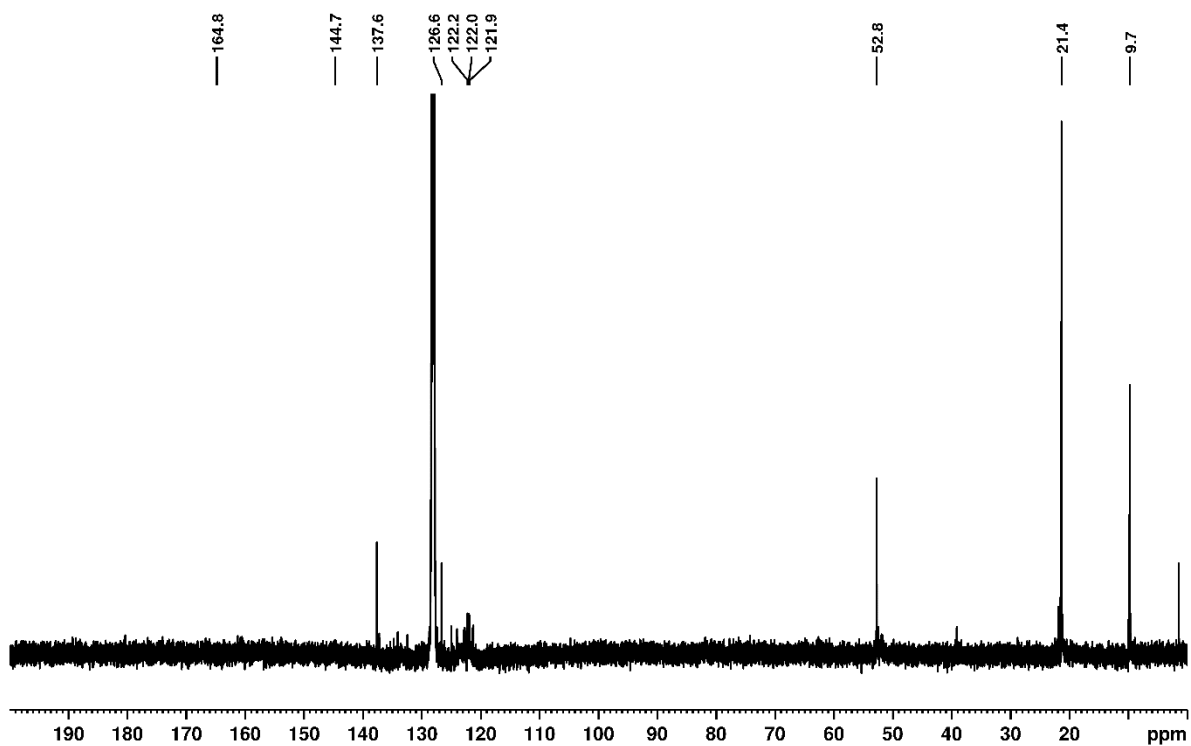

Figure S32. <sup>13</sup>C NMR spectrum (100.6 MHz, C<sub>6</sub>D<sub>6</sub>, 298 K) of (*i*Pr<sup>Me</sup>)<sub>2</sub>AlHInd<sub>2</sub> **13**.

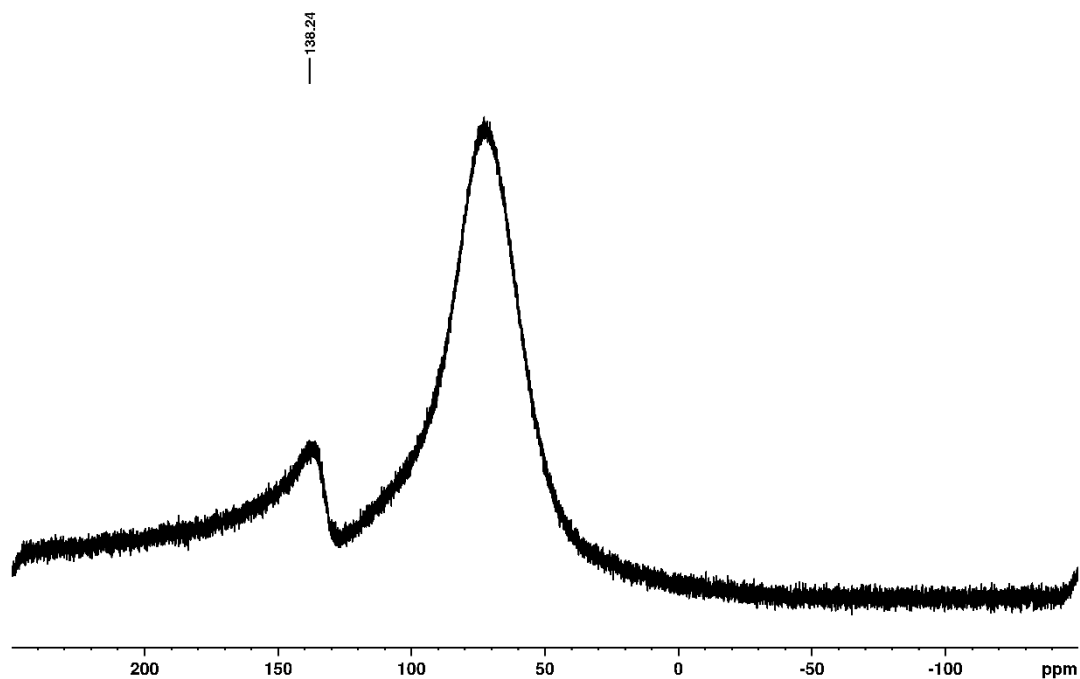

**Figure S33.**  $^{27}\text{Al}$  NMR spectrum (104.3 MHz,  $\text{C}_6\text{D}_6$ , 298 K) of  $(\text{liPr}^{\text{Me}})\text{-AlHInd}_2$  **13**.

$(\text{liPr})\text{-AlHInd}_2$  **14**:

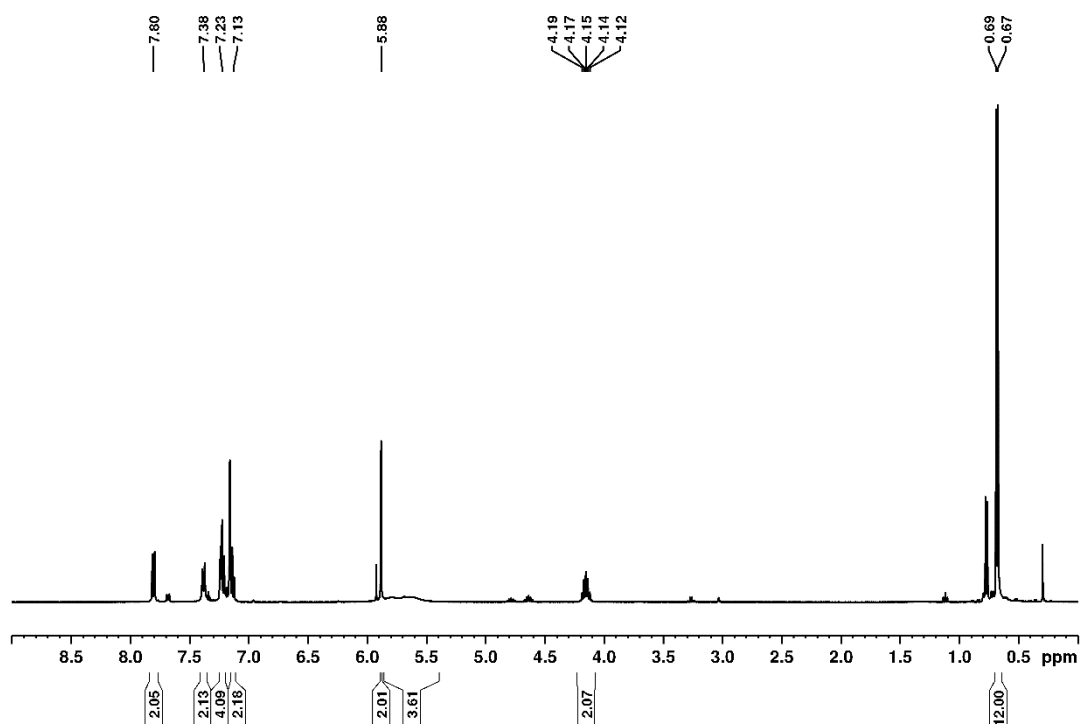

**Figure S34.**  $^1\text{H}$  NMR spectrum (400.1 MHz,  $\text{C}_6\text{D}_6$ , 298 K) of  $(\text{liPr})\text{-AlHInd}_2$  **14** (unmarked signals belong to unknown impurities).

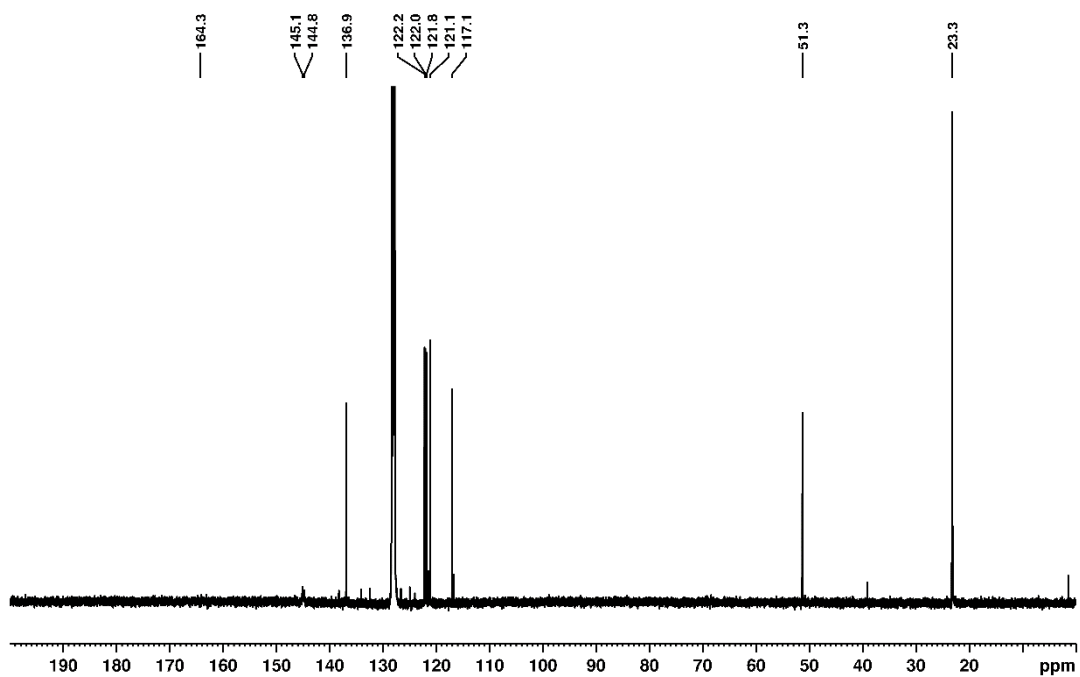

Figure S35.  $^{13}\text{C}$  NMR spectrum (100.6 MHz,  $\text{C}_6\text{D}_6$ , 298 K) of  $(i\text{Pr})\cdot\text{AlHInd}_2$  **14**.

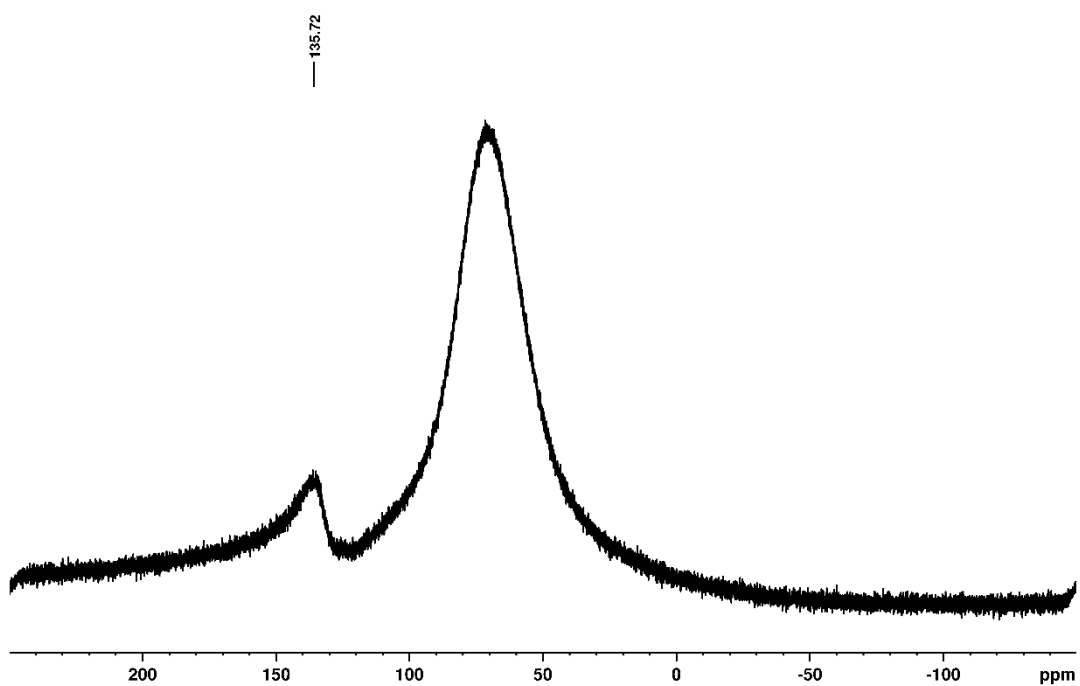

Figure S36.  $^{27}\text{Al}$  NMR spectrum (104.3 MHz,  $\text{C}_6\text{D}_6$ , 298 K) of  $(i\text{Pr})\cdot\text{AlHInd}_2$  **14**.

(IMe<sup>Me</sup>)-AlHInd<sub>2</sub> **15**:

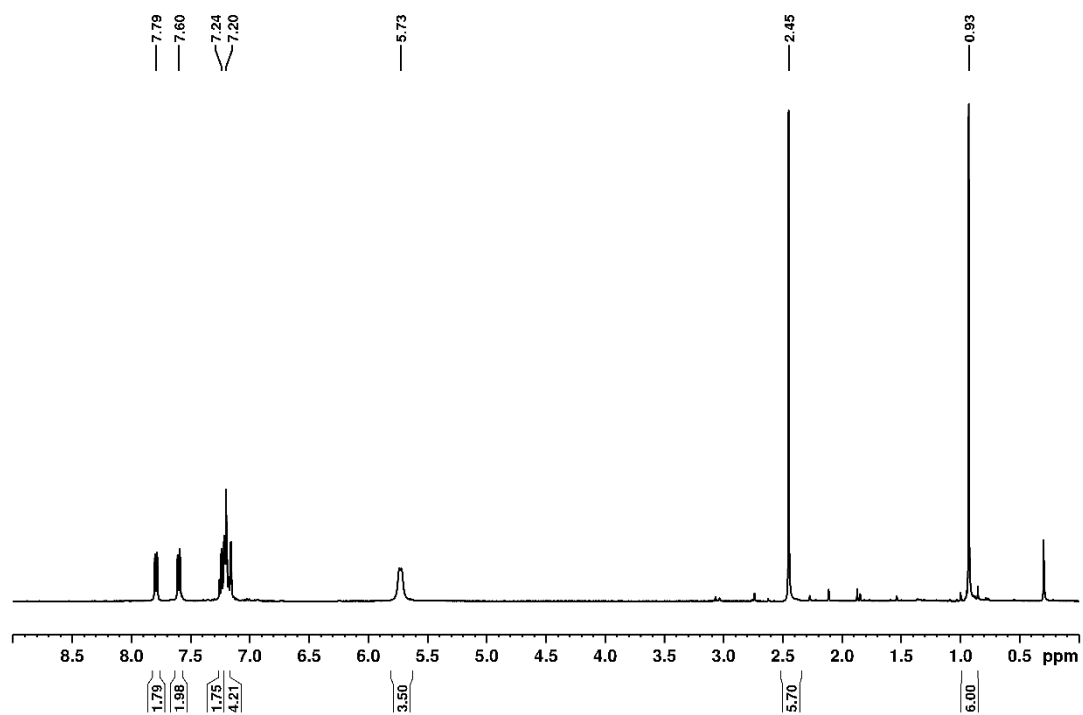

Figure S37. <sup>1</sup>H NMR spectrum (400.1 MHz, C<sub>6</sub>D<sub>6</sub>, 298 K) of (IMe<sup>Me</sup>)-AlHInd<sub>2</sub> **15**.

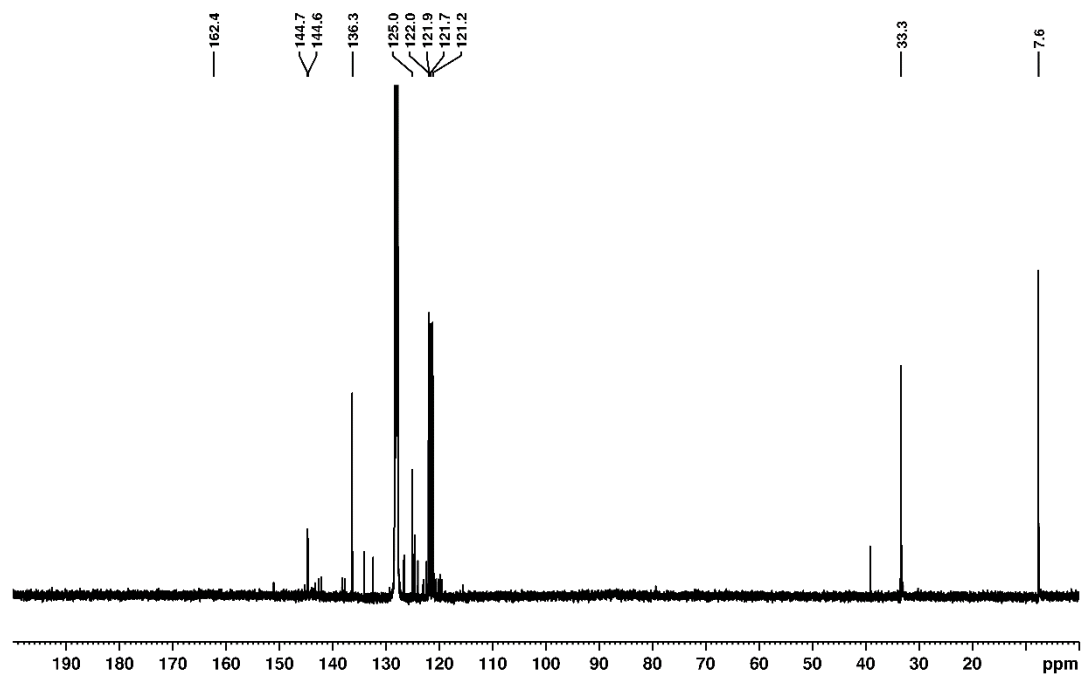

Figure S38. <sup>13</sup>C NMR spectrum (100.6 MHz, C<sub>6</sub>D<sub>6</sub>, 298 K) of (IMe<sup>Me</sup>)-AlHInd<sub>2</sub> **15**.

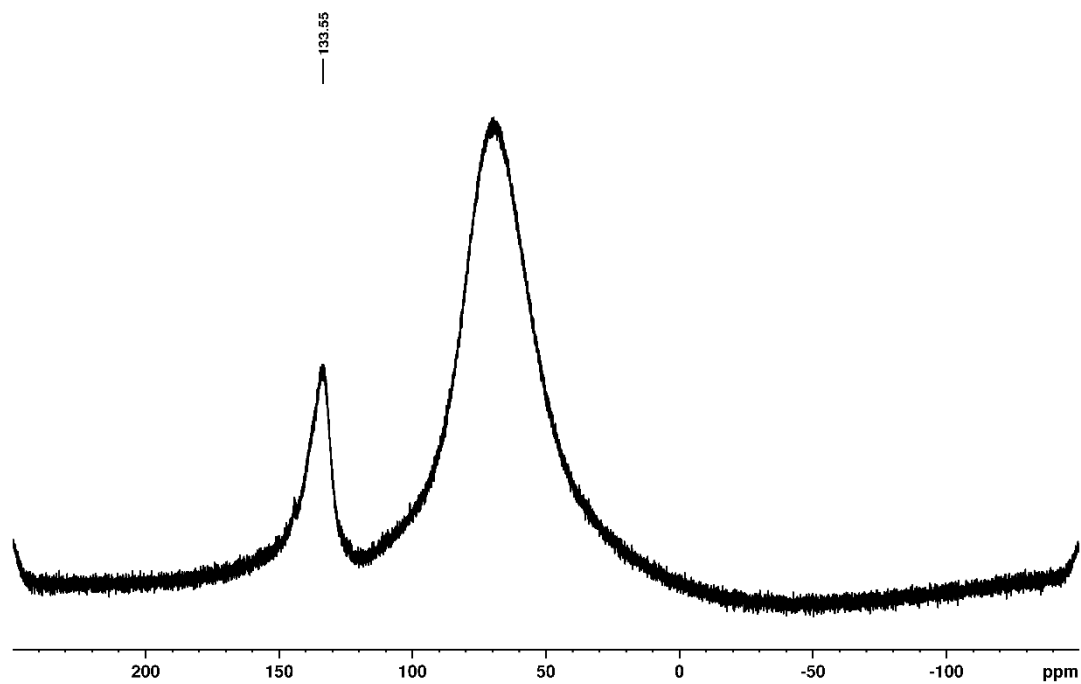

Figure S39.  $^{27}\text{Al}$  NMR spectrum (104.3 MHz,  $\text{C}_6\text{D}_6$ , 298 K) of  $(\text{IMe}^{\text{Me}})\cdot\text{AlHInd}_2$  **15**.

$(\text{iPr}^{\text{Me}})\cdot\text{AlHF}_2$  **16**:

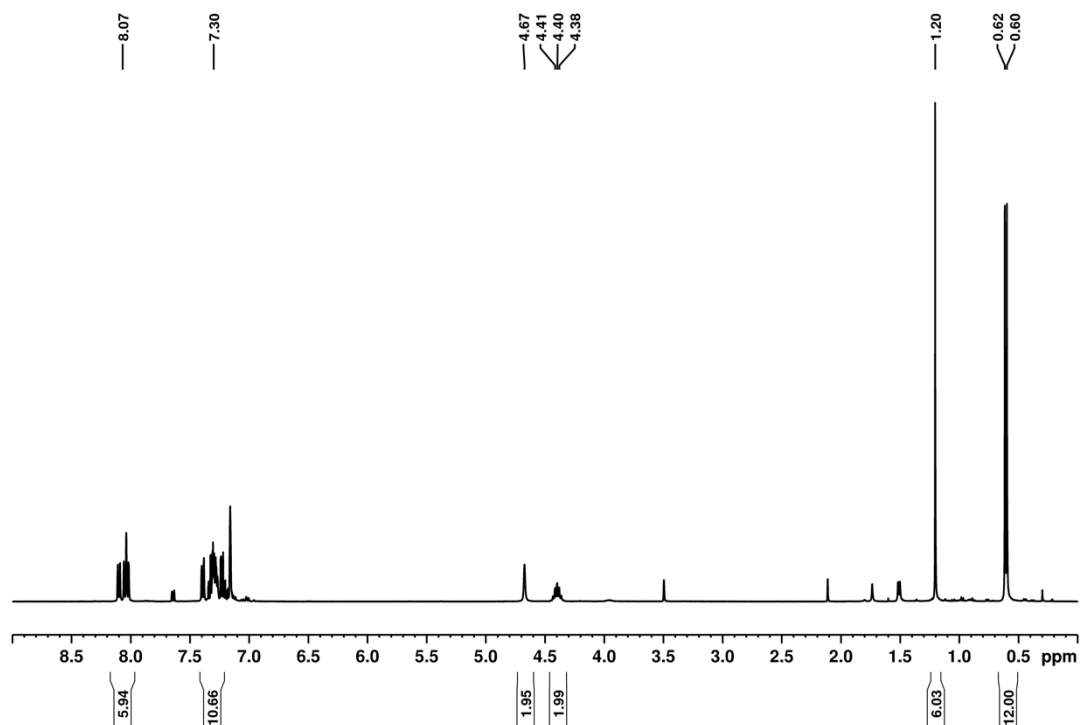

Figure S40.  $^1\text{H}$  NMR spectrum (400.1 MHz,  $\text{C}_6\text{D}_6$ , 298 K) of  $(\text{iPr}^{\text{Me}})\cdot\text{AlHF}_2$  **16**.

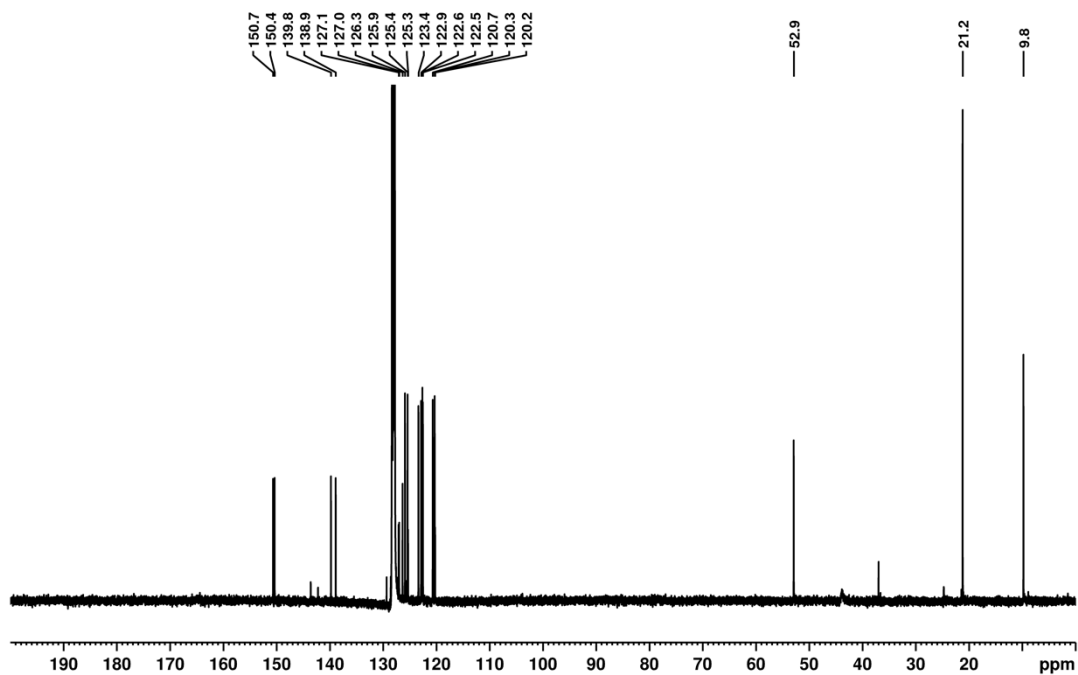

**Figure S41.**  $^{13}\text{C}$  NMR spectrum (100.6 MHz,  $\text{C}_6\text{D}_6$ , 298 K) of  $(i\text{Pr}^{\text{Me}})_2\text{AlHfI}_2$  **16**.

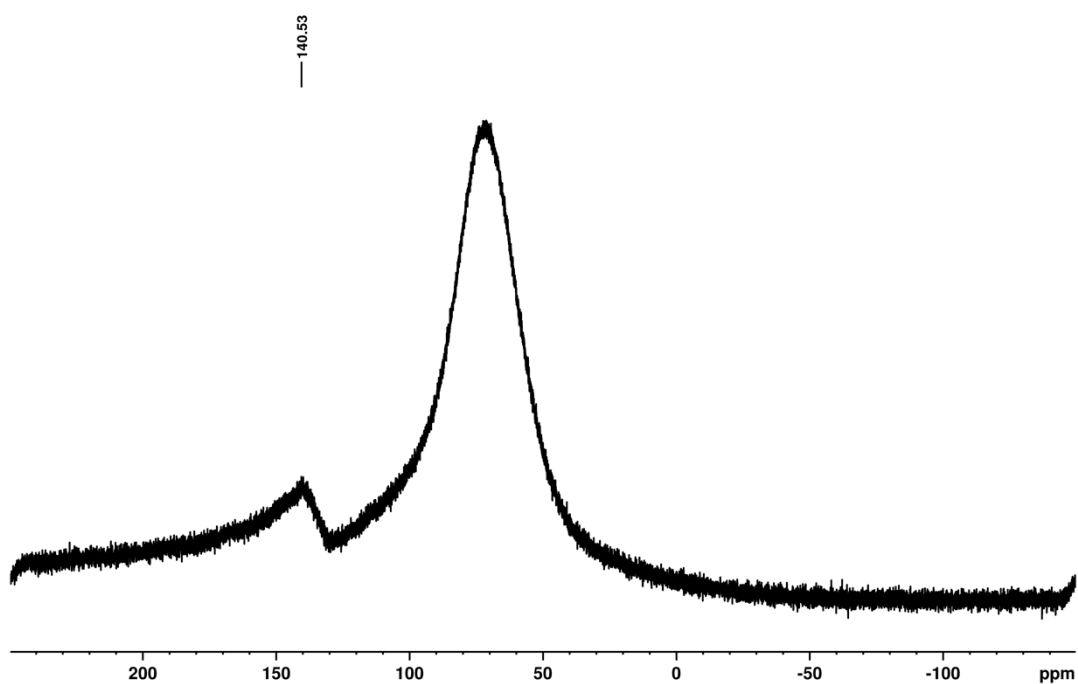

**Figure S42.**  $^{27}\text{Al}$  NMR spectrum (104.3 MHz,  $\text{C}_6\text{D}_6$ , 298 K) of  $(i\text{Pr}^{\text{Me}})_2\text{AlHfI}_2$  **16**.

(*i*Pr)<sub>2</sub>AlHfCl<sub>2</sub> **17**:

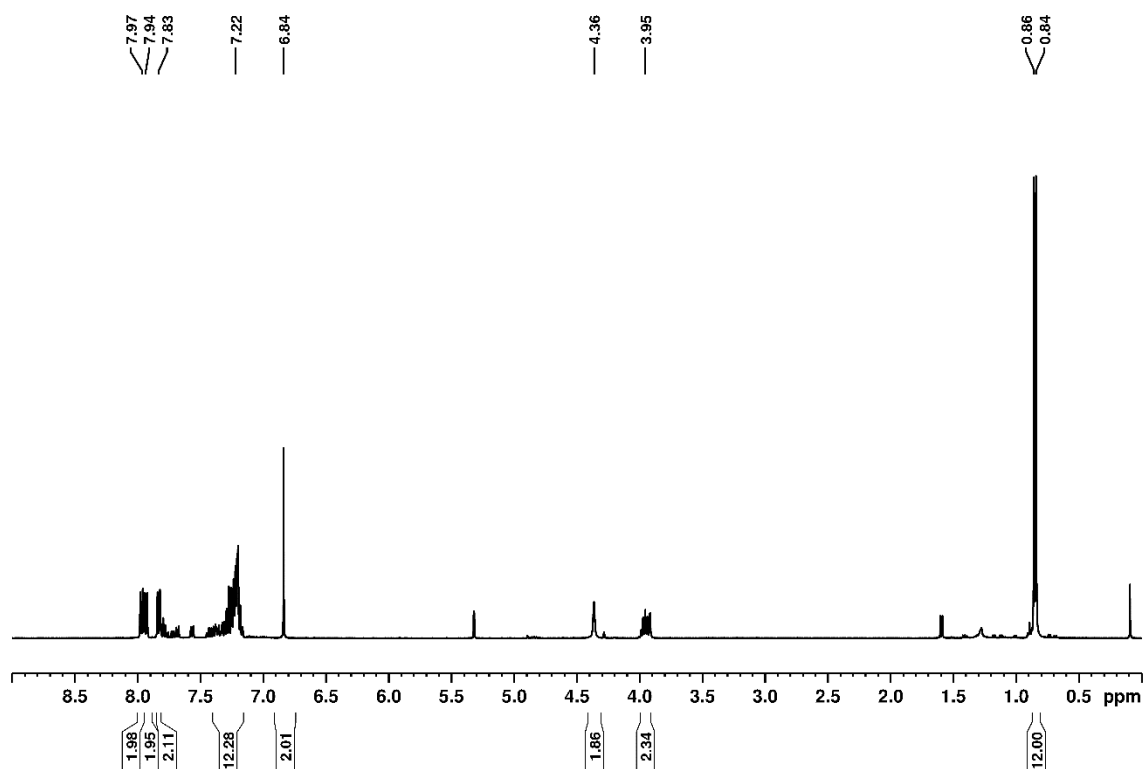

**Figure S43.** <sup>1</sup>H NMR spectrum (400.1 MHz, CD<sub>2</sub>Cl<sub>2</sub>, 298 K) of (*i*Pr)<sub>2</sub>AlHfCl<sub>2</sub> **17** (unmarked signals belong to unknown impurities due to minor decomposition in CD<sub>2</sub>Cl<sub>2</sub>).

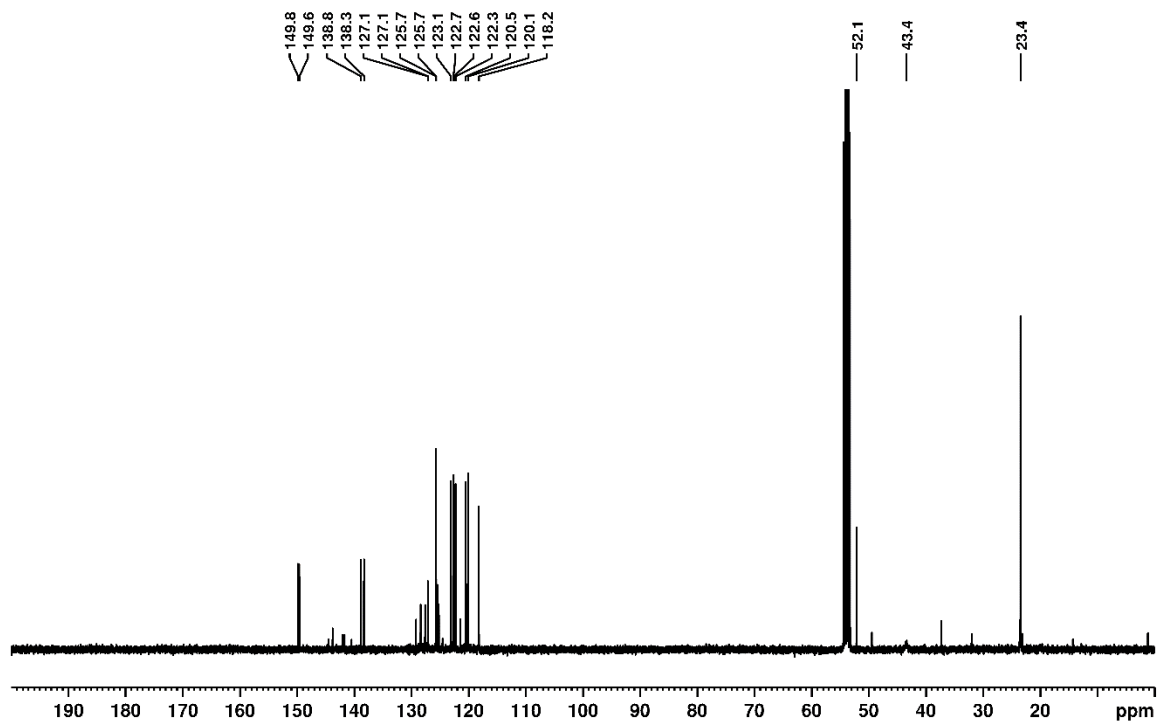

**Figure S44.** <sup>13</sup>C NMR spectrum (100.6 MHz, CD<sub>2</sub>Cl<sub>2</sub>, 298 K) of (*i*Pr)<sub>2</sub>AlHfCl<sub>2</sub> **17** (unmarked signals belong to unknown impurities due to minor decomposition in CD<sub>2</sub>Cl<sub>2</sub>).

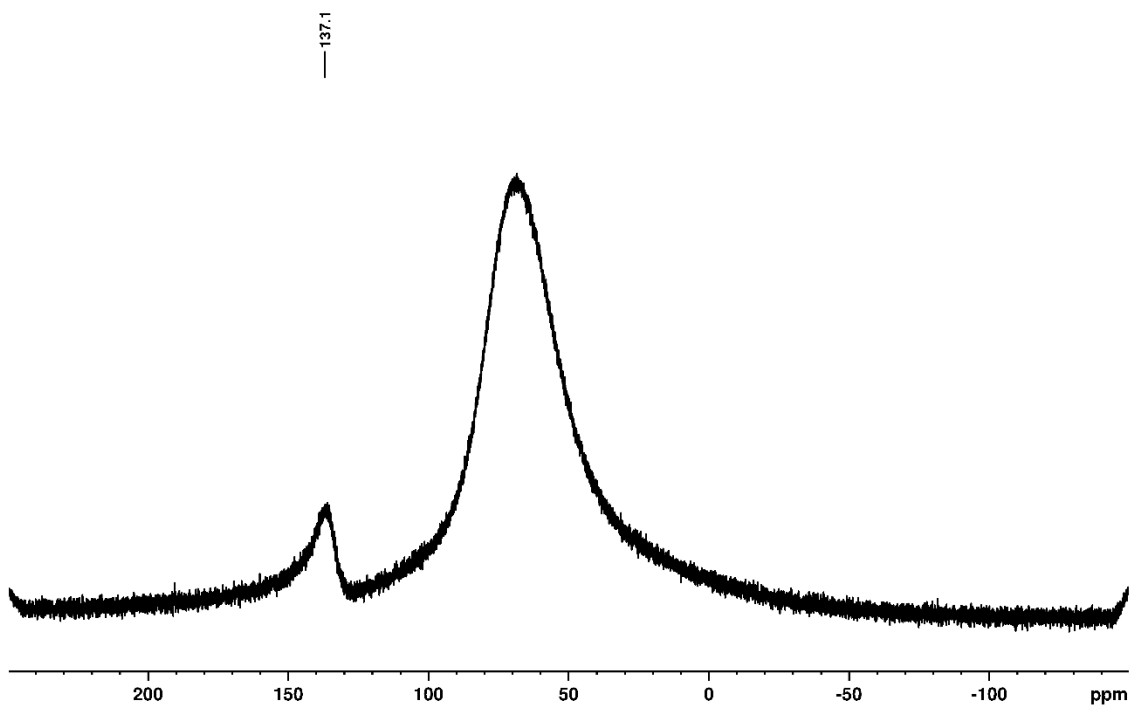

Figure S45.  $^{27}\text{Al}$  NMR spectrum (104.3 MHz,  $\text{CD}_2\text{Cl}_2$ , 298 K) of  $(i\text{Pr})\cdot\text{AlHF}_2$  **17**.

$(\text{IMe}^{\text{Me}})\cdot\text{AlHF}_2$  **18**:

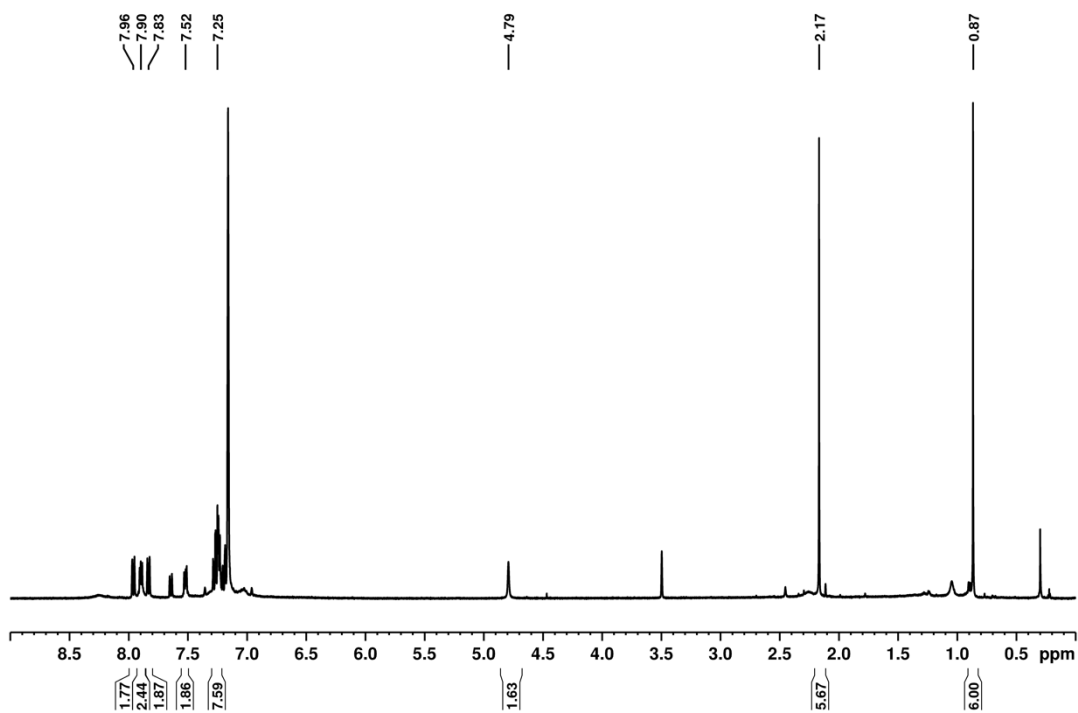

Figure S46.  $^1\text{H}$  NMR spectrum (400.1 MHz,  $\text{C}_6\text{D}_6$ , 298 K) of  $(\text{IMe}^{\text{Me}})\cdot\text{AlHF}_2$  **18**.



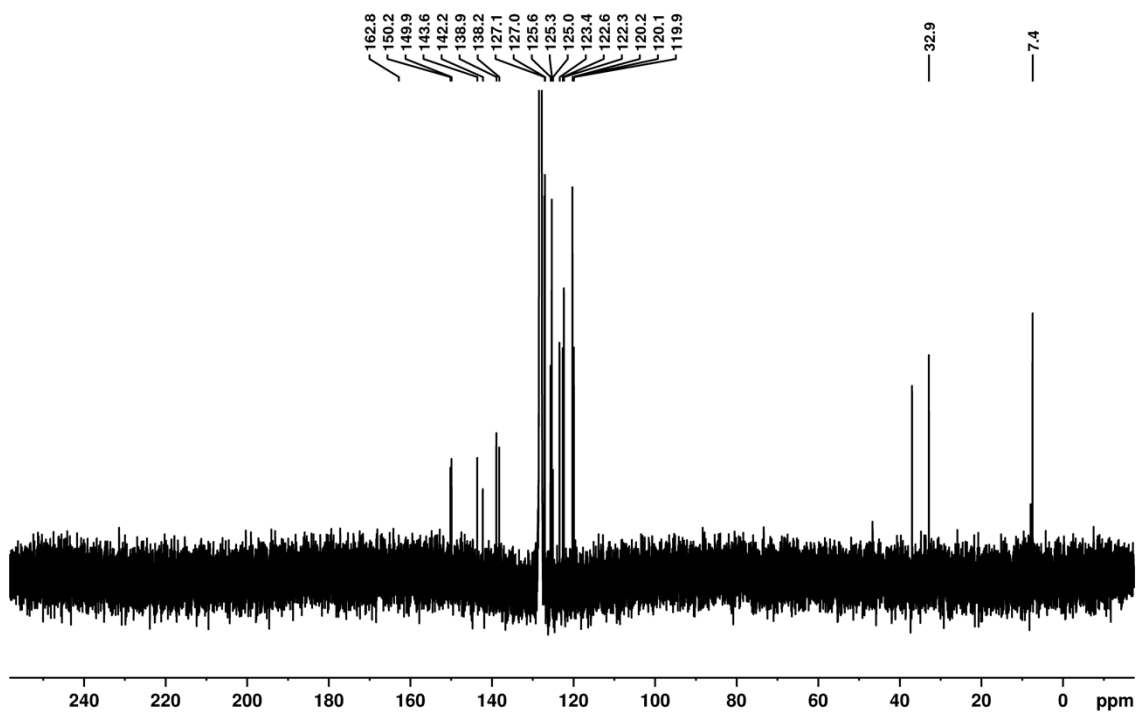

Figure S47.  $^{13}\text{C}$  NMR spectrum (100.6 MHz,  $\text{C}_6\text{D}_6$ , 298 K) of  $(\text{IMe}^{\text{Me}})\text{-AlHFl}_2$  **18**.

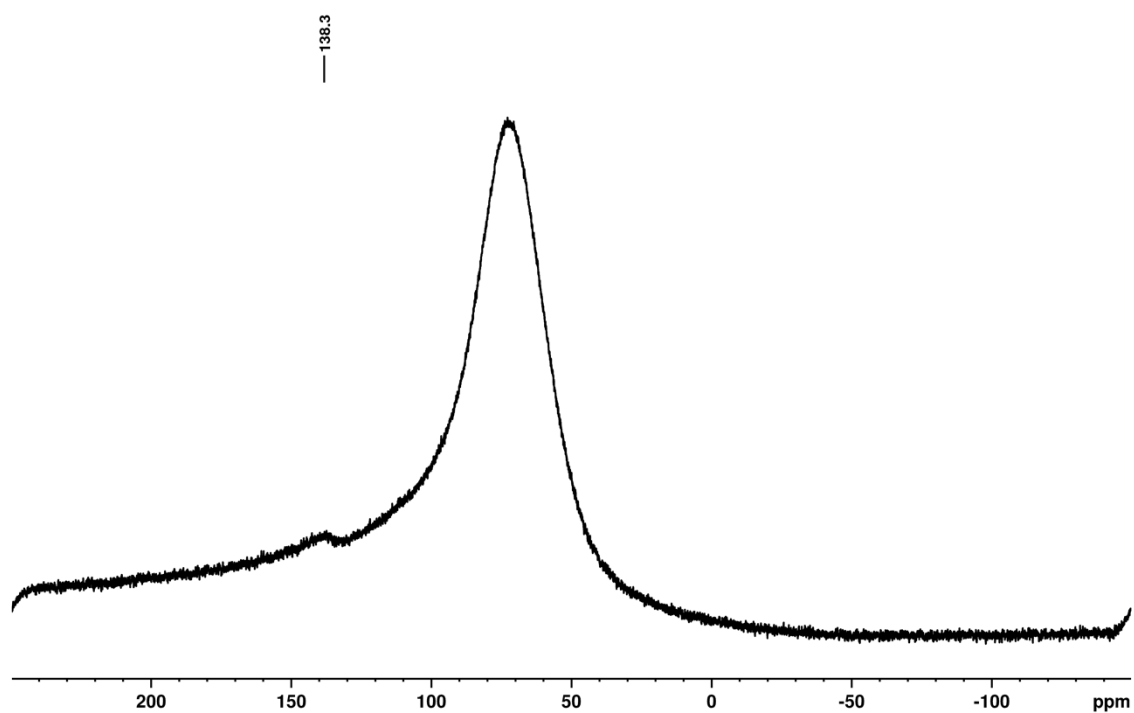

Figure S48.  $^{27}\text{Al}$  NMR spectrum (104.3 MHz,  $\text{C}_6\text{D}_6$ , 298 K) of  $(\text{IMe}^{\text{Me}})\text{-AlHFl}_2$  **18**.

$\{(i\text{Pr}^{\text{Me}})\cdot\text{AlH}_2\}_2\text{-}\mu\text{-FI 19}$ :

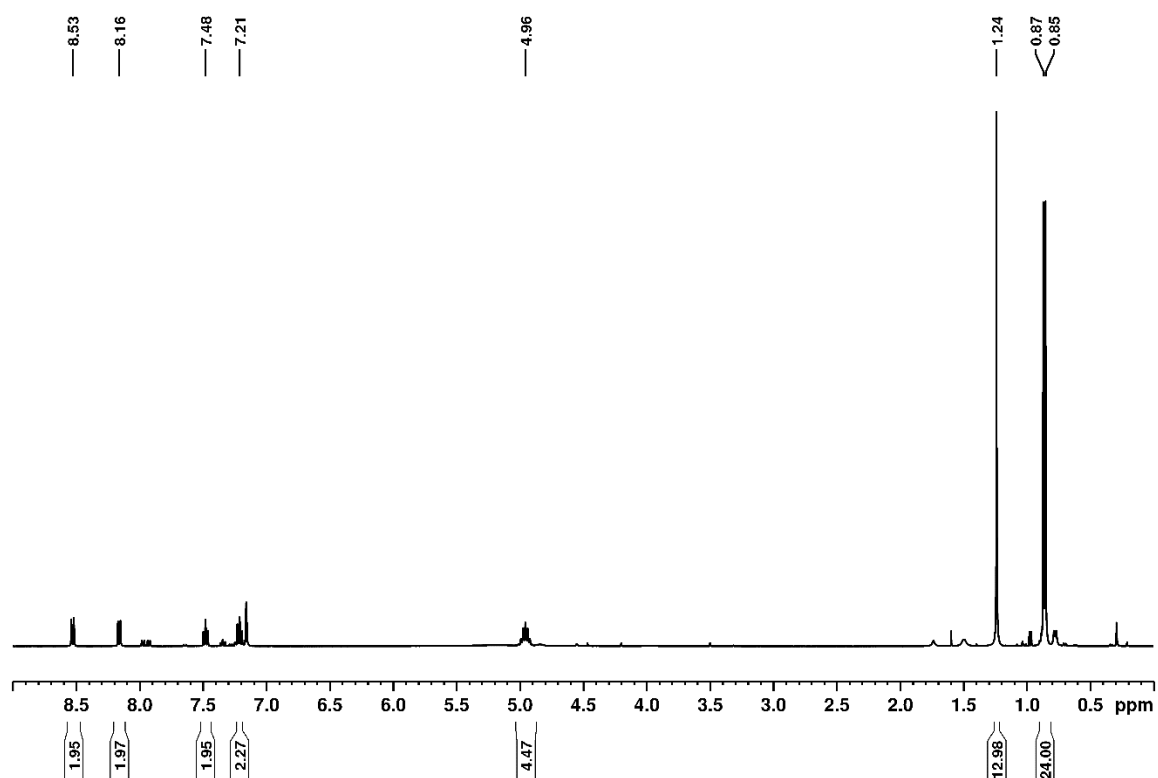

Figure S49.  $^1\text{H}$  NMR spectrum (400.1 MHz,  $\text{C}_6\text{D}_6$ , 298 K) of  $\{(i\text{Pr}^{\text{Me}})\cdot\text{AlH}_2\}_2\text{-}\mu\text{-FI 19}$ .

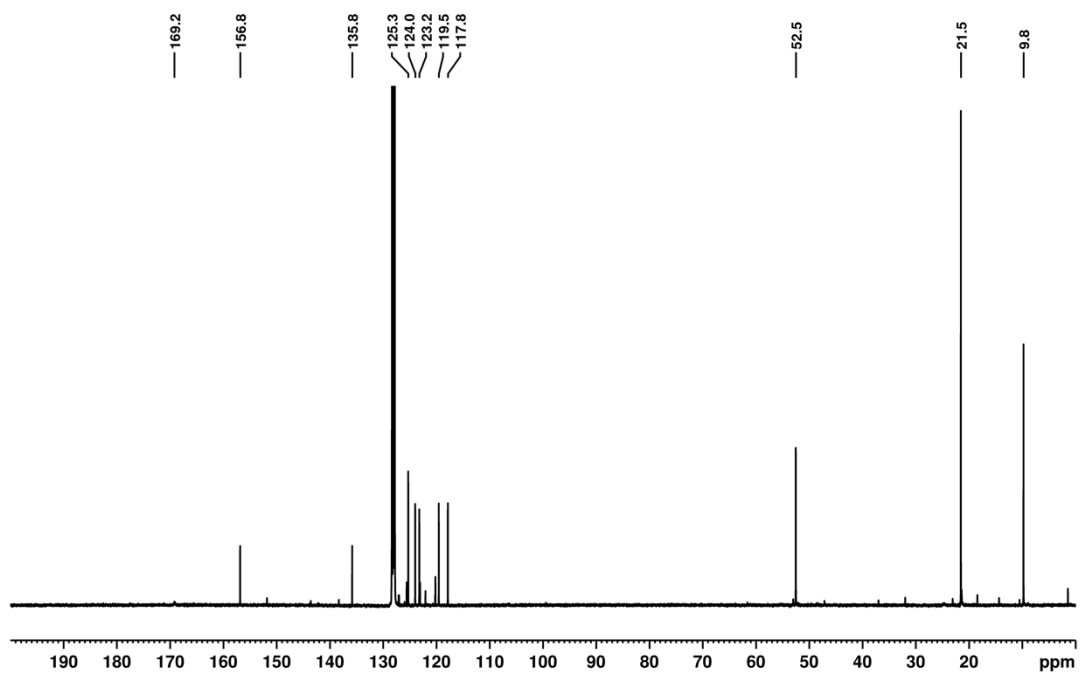

Figure S50.  $^{13}\text{C}$  NMR spectrum (100.6 MHz,  $\text{C}_6\text{D}_6$ , 298 K) of  $\{(i\text{Pr}^{\text{Me}})\cdot\text{AlH}_2\}_2\text{-}\mu\text{-FI 19}$ .

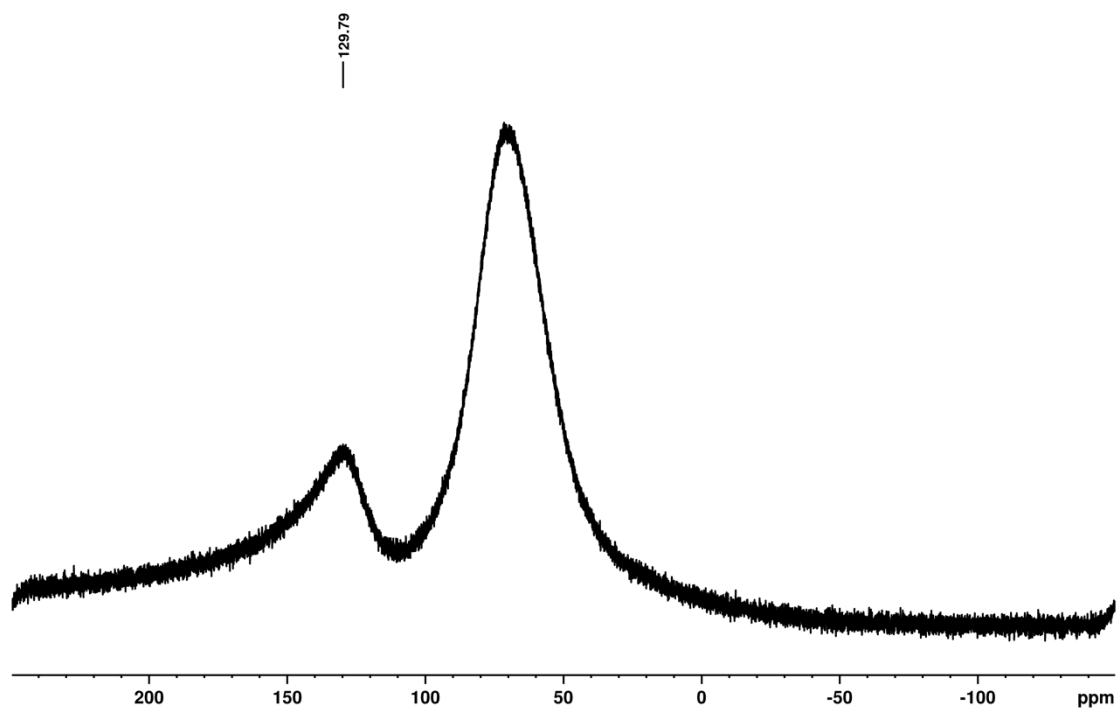

Figure S51.  $^{27}\text{Al}$  NMR spectrum (104.3 MHz,  $\text{C}_6\text{D}_6$ , 298 K) of  $\{(\text{iPr}^{\text{Me}})\cdot\text{AlH}_2\}_2\text{-}\mu\text{-FI 19}$ .

$\{(\text{iPr})\cdot\text{AlH}_2\}_2\text{-}\mu\text{-FI 20}$ :

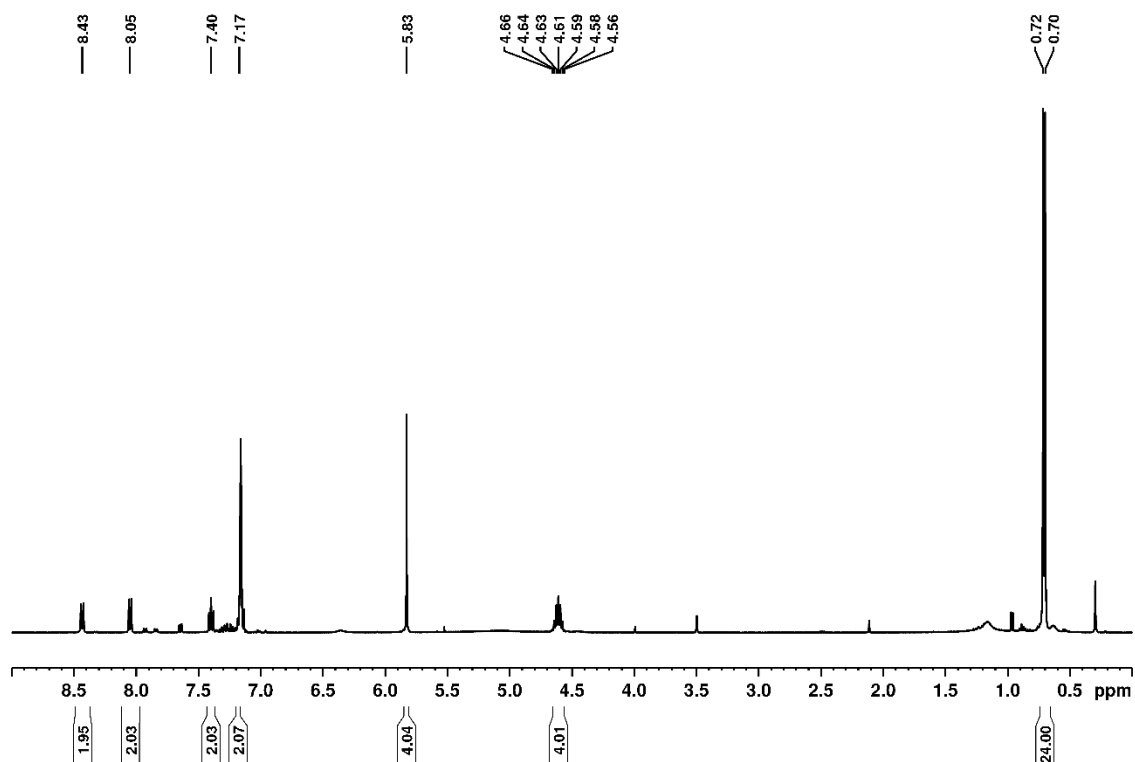

Figure S52.  $^1\text{H}$  NMR spectrum (400.1 MHz,  $\text{C}_6\text{D}_6$ , 298 K) of  $\{(\text{iPr})\cdot\text{AlH}_2\}_2\text{-}\mu\text{-FI 20}$ .

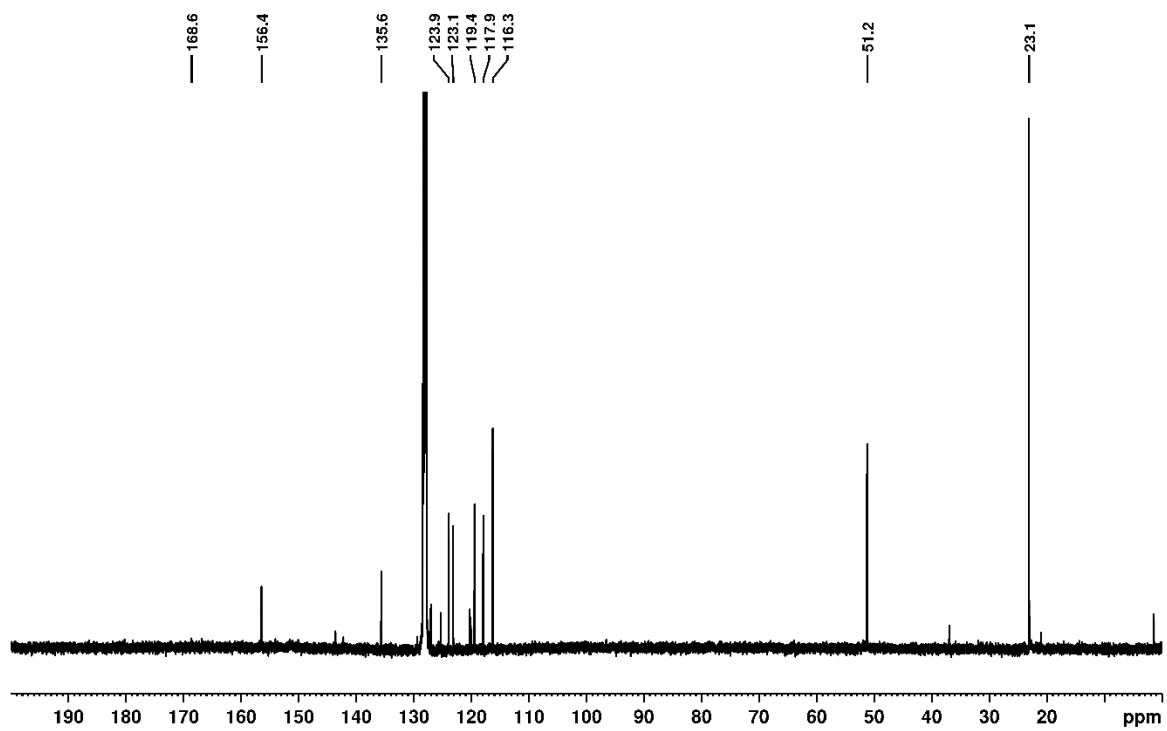

Figure S53.  $^{13}\text{C}$  NMR spectrum (100.6 MHz,  $\text{C}_6\text{D}_6$ , 298 K) of  $\{(i\text{Pr})\cdot\text{AlH}_2\}_2\text{-}\mu\text{-FI 20}$ .

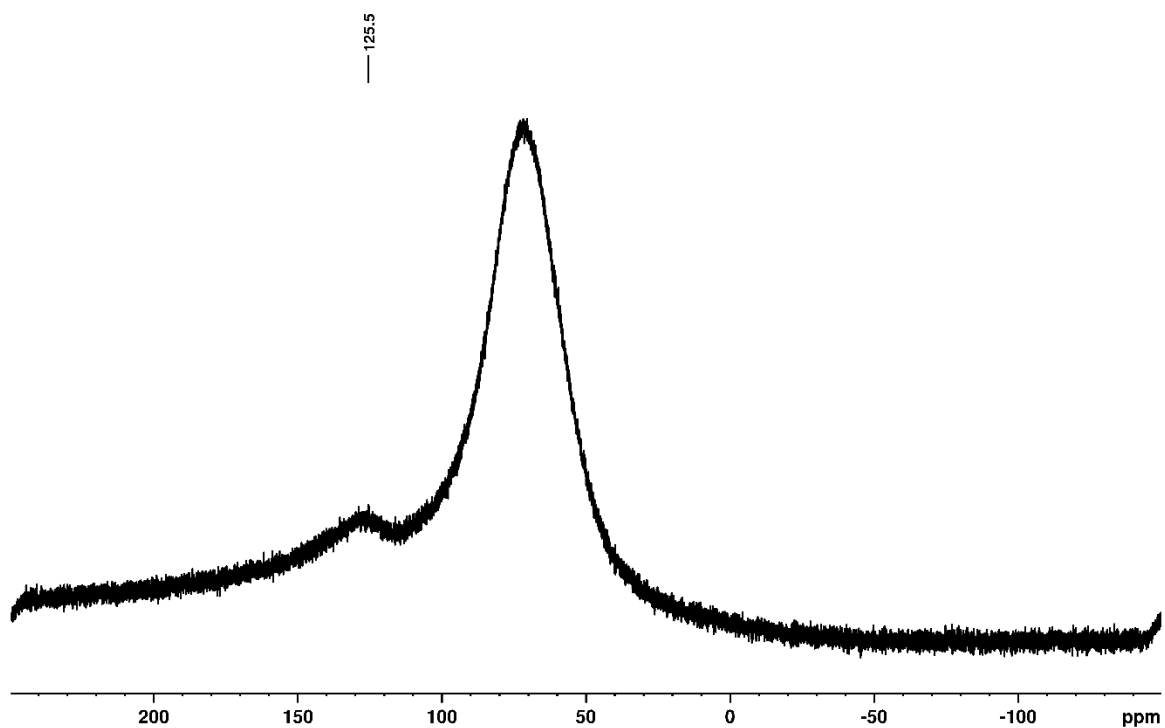

Figure S54.  $^{27}\text{Al}$  NMR spectrum (104.3 MHz,  $\text{C}_6\text{D}_6$ , 298 K) of  $\{(i\text{Pr})\cdot\text{AlH}_2\}_2\text{-}\mu\text{-FI 20}$ .

$\{(i\text{Pr}^{\text{Me}})\text{-AlH-}\mu\text{-Fl}\}_2$  **21**:

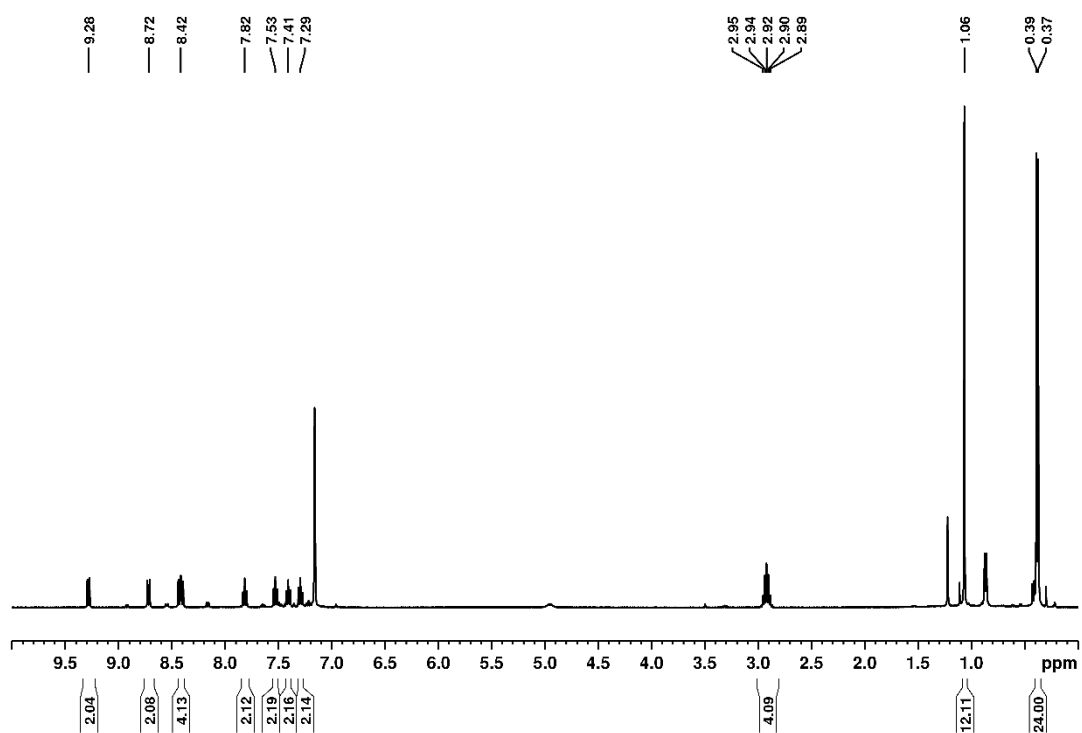

Figure S55.  $^1\text{H}$  NMR spectrum (400.1 MHz,  $\text{C}_6\text{D}_6$ , 298 K) of  $\{(i\text{Pr}^{\text{Me}})\text{-AlH-}\mu\text{-Fl}\}_2$  **21**.

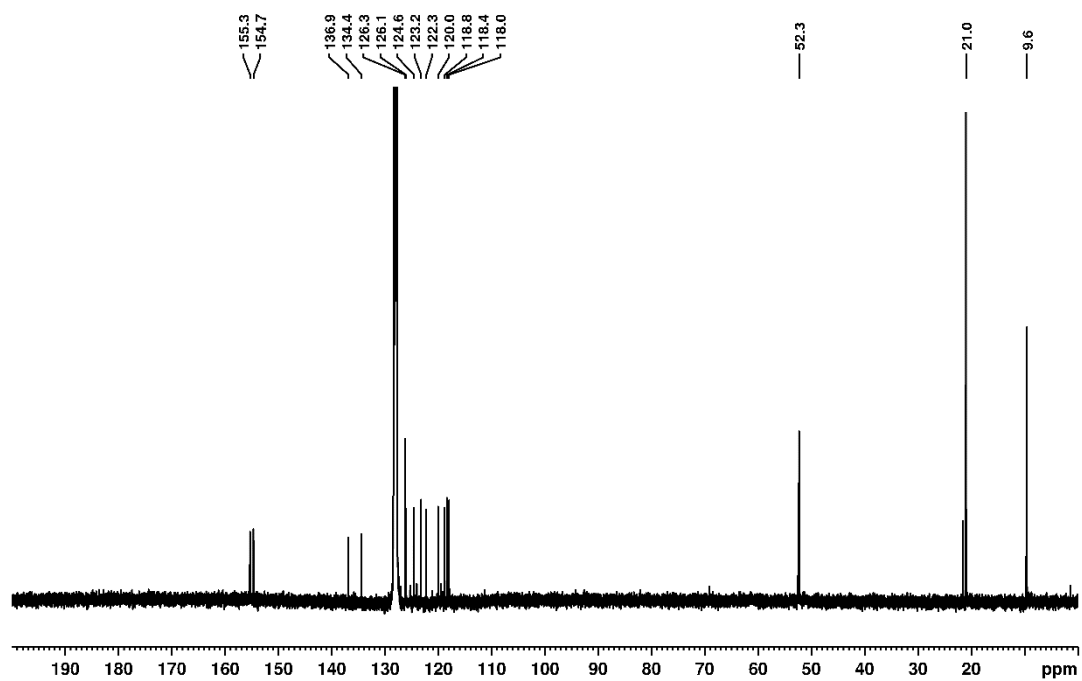

Figure S56.  $^{13}\text{C}$  NMR spectrum (100.6 MHz,  $\text{C}_6\text{D}_6$ , 298 K) of  $\{(i\text{Pr}^{\text{Me}})\text{-AlH-}\mu\text{-Fl}\}_2$  **21**.

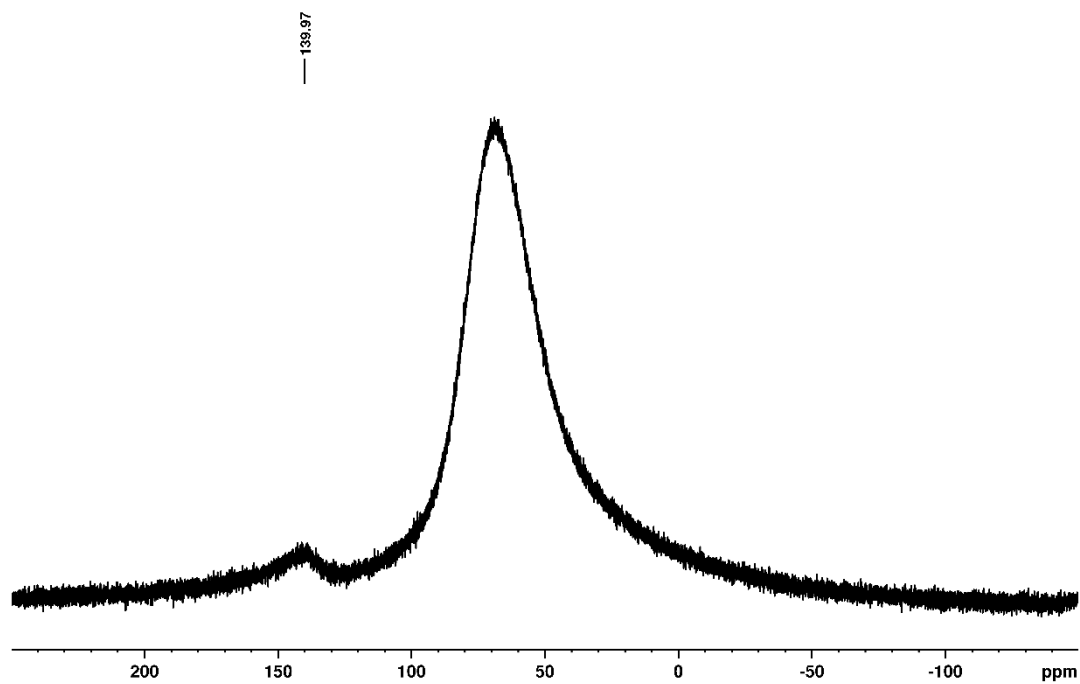

Figure S57.  $^{27}\text{Al}$  NMR spectrum (104.3 MHz,  $\text{C}_6\text{D}_6$ , 298 K) of  $\{(\text{iPr}^{\text{Me}})_2\text{AlH}-\mu\text{-FI}\}_2$  **21**.

$\{(\text{iPr}^{\text{Me}})_2\text{AlH}-\mu\text{-Ind}\}_2$  **22**:

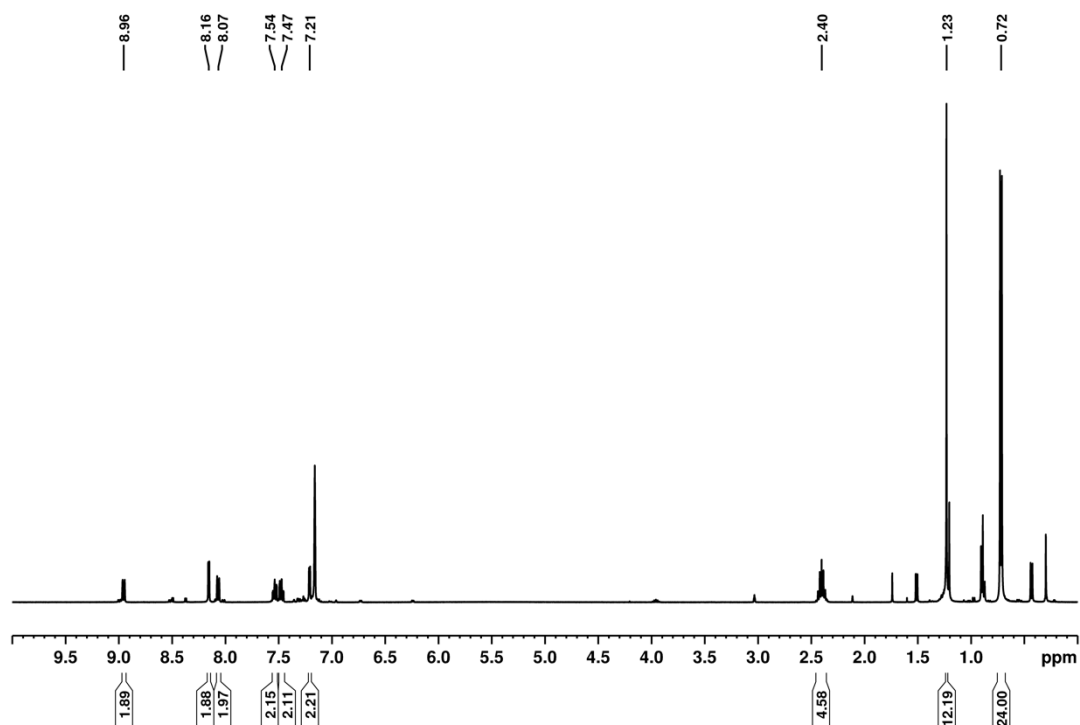

Figure S58.  $^1\text{H}$  NMR spectrum (400.1 MHz,  $\text{C}_6\text{D}_6$ , 298 K) of  $\{(\text{iPr}^{\text{Me}})_2\text{AlH}-\mu\text{-Ind}\}_2$  **22**.

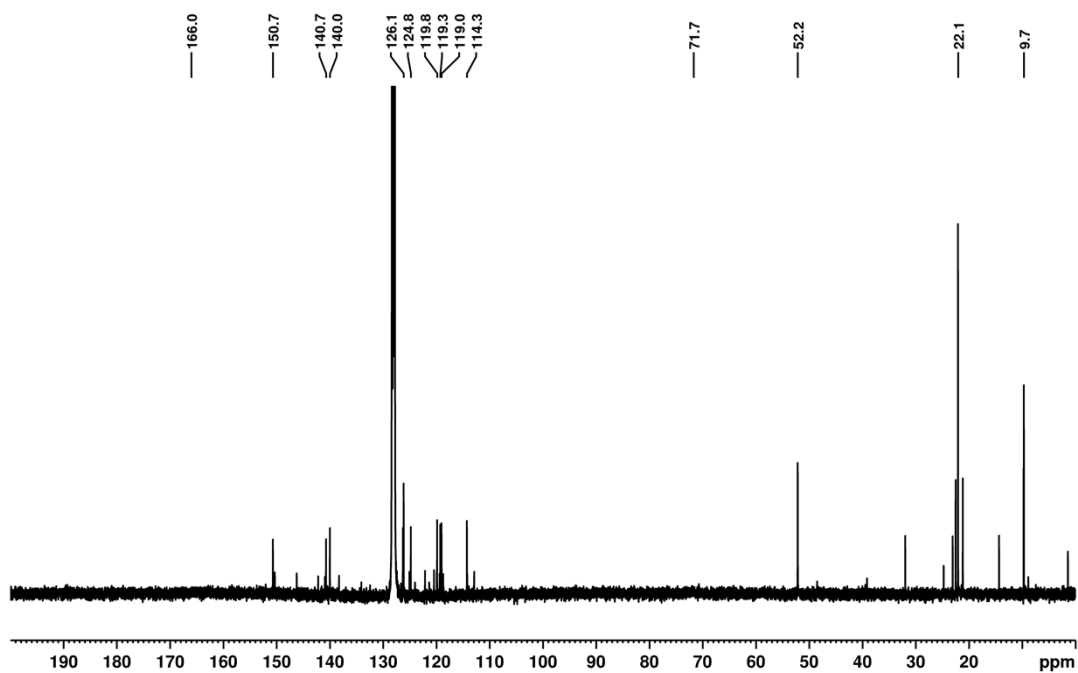

Figure S59.  $^{13}\text{C}$  NMR spectrum (100.6 MHz,  $\text{C}_6\text{D}_6$ , 298 K) of  $\{(\text{iPr}^{\text{Me}})\cdot\text{AlH}-\mu\text{-Ind}\}_2$  **22**.

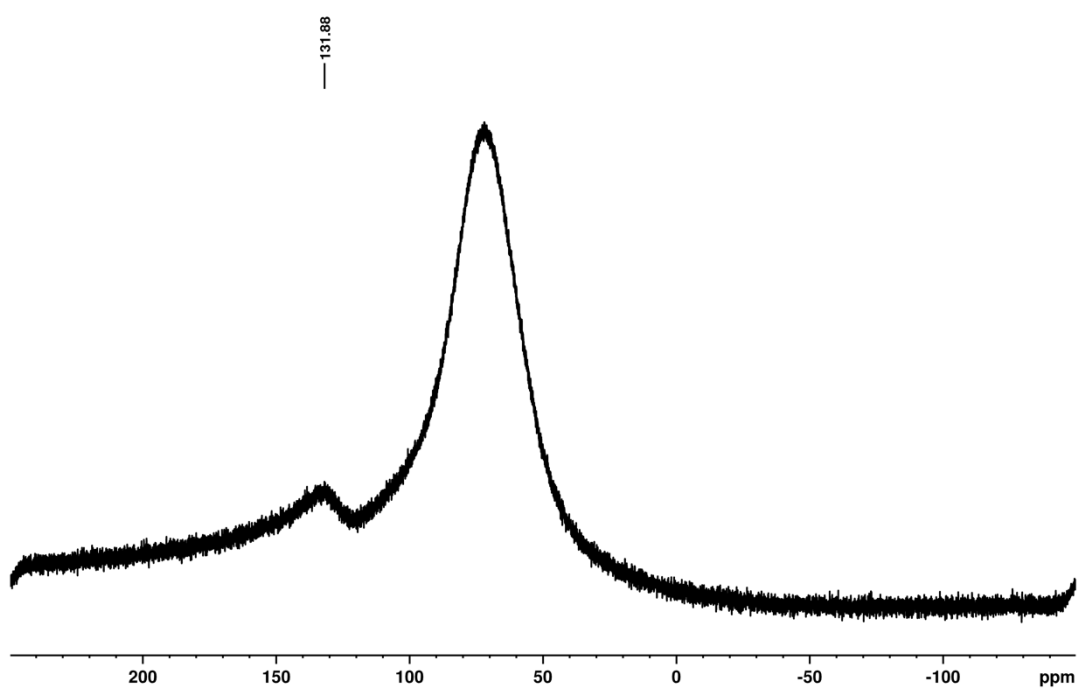

Figure S60.  $^{27}\text{Al}$  NMR spectrum (104.3 MHz,  $\text{C}_6\text{D}_6$ , 298 K) of  $\{(\text{iPr}^{\text{Me}})\cdot\text{AlH}-\mu\text{-Ind}\}_2$  **22**.

$\{(IMe^{Me})\cdot AlH-\mu-Ind\}_3$  **23**:

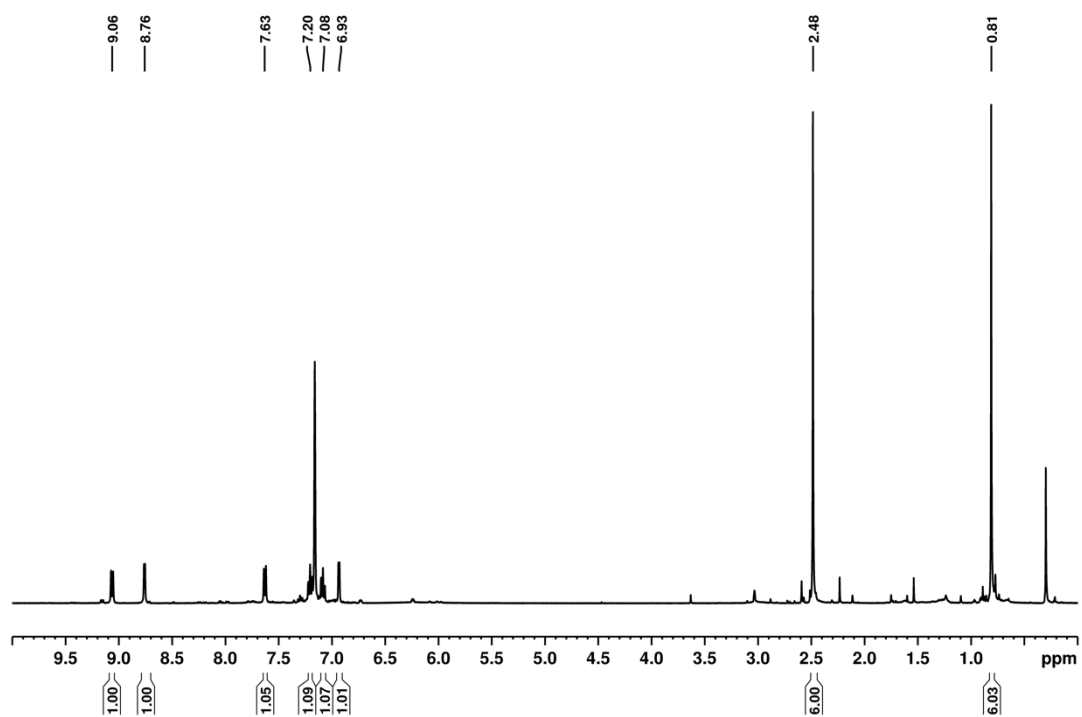

Figure S61.  $^1H$  NMR spectrum (400.1 MHz,  $C_6D_6$ , 298 K) of  $\{(IMe^{Me})\cdot AlH-\mu-Ind\}_3$  **23**.

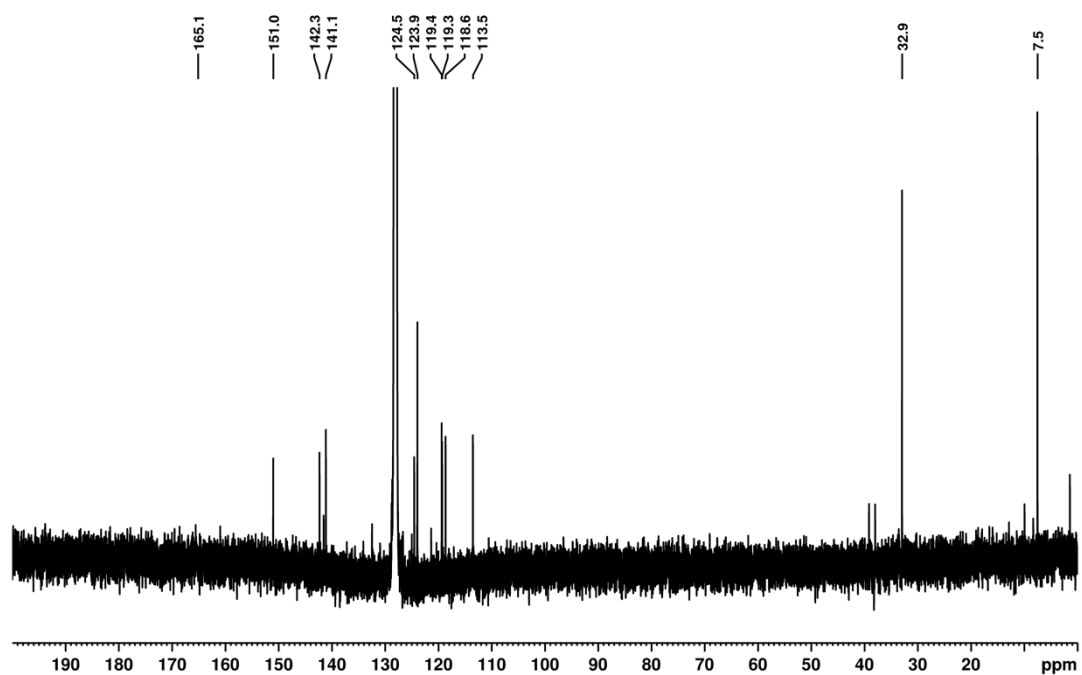

Figure S62.  $^{13}C$  NMR spectrum (100.6 MHz,  $C_6D_6$ , 298 K) of  $\{(IMe^{Me})\cdot AlH-\mu-Ind\}_3$  **23**.



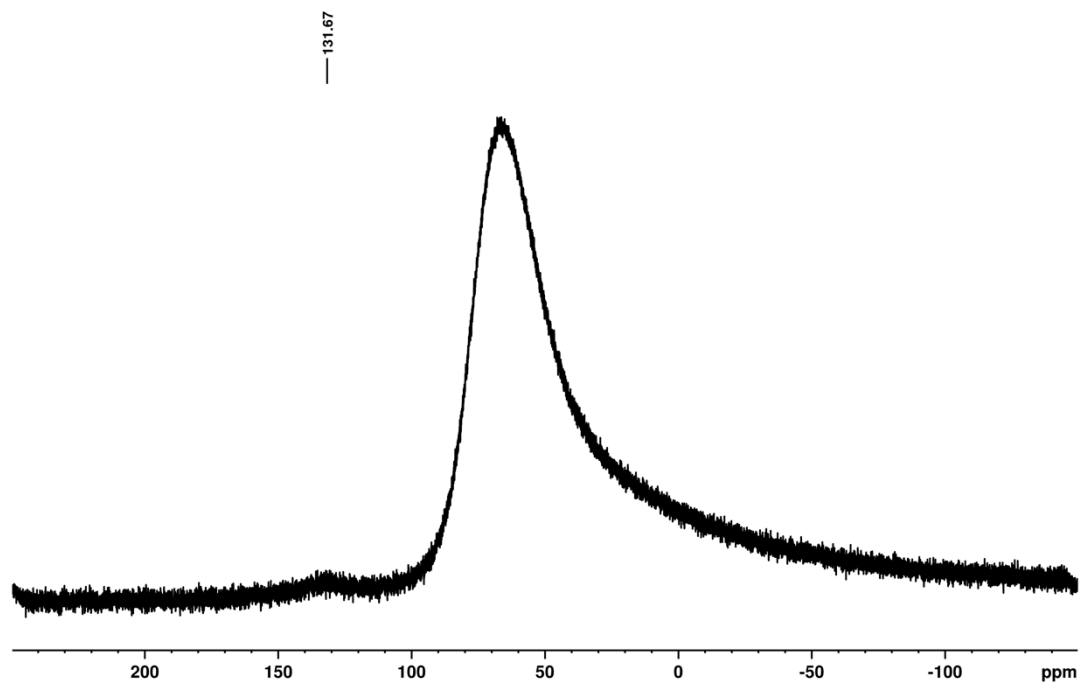

**Figure S63.**  $^{27}\text{Al}$  NMR spectrum (104.3 MHz,  $\text{C}_6\text{D}_6$ , 298 K) of  $\{(\text{IMe}^{\text{Me}})\text{-AlH-}\mu\text{-Ind}\}_3$  **23**.

## 2) Thermal properties

DSC /(mW/mg)

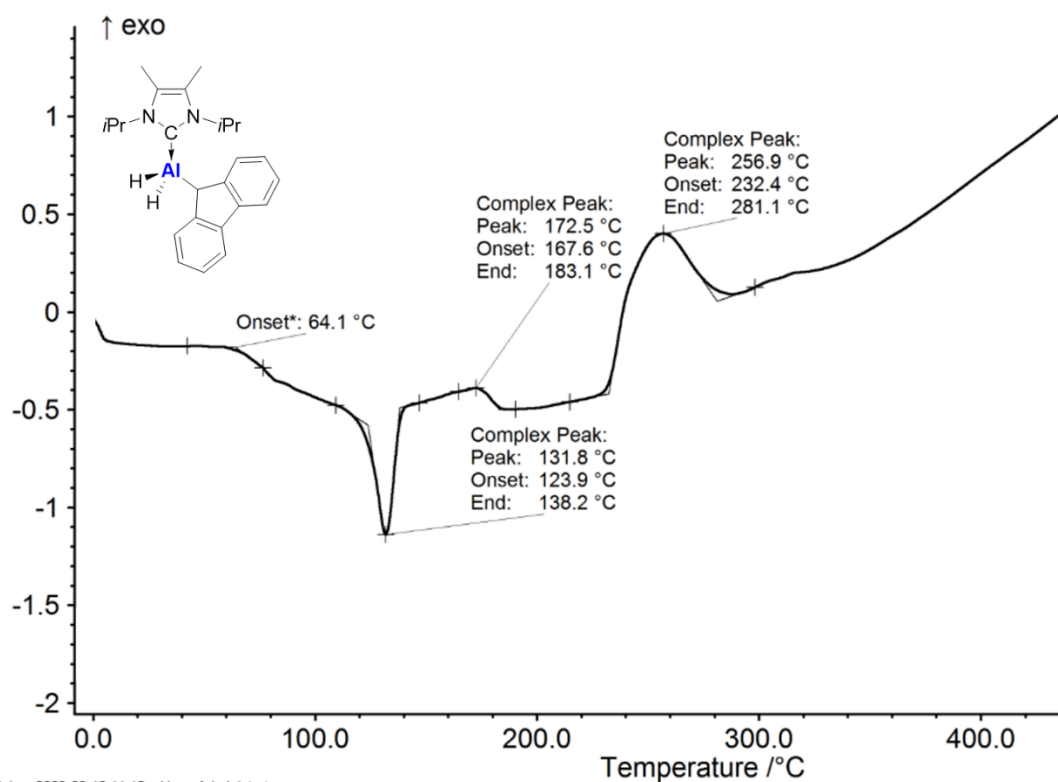

Figure S64. DSC curve of  $(iPr^{Me}) \cdot AlH_2FI$  4.

DSC /(mW/mg)

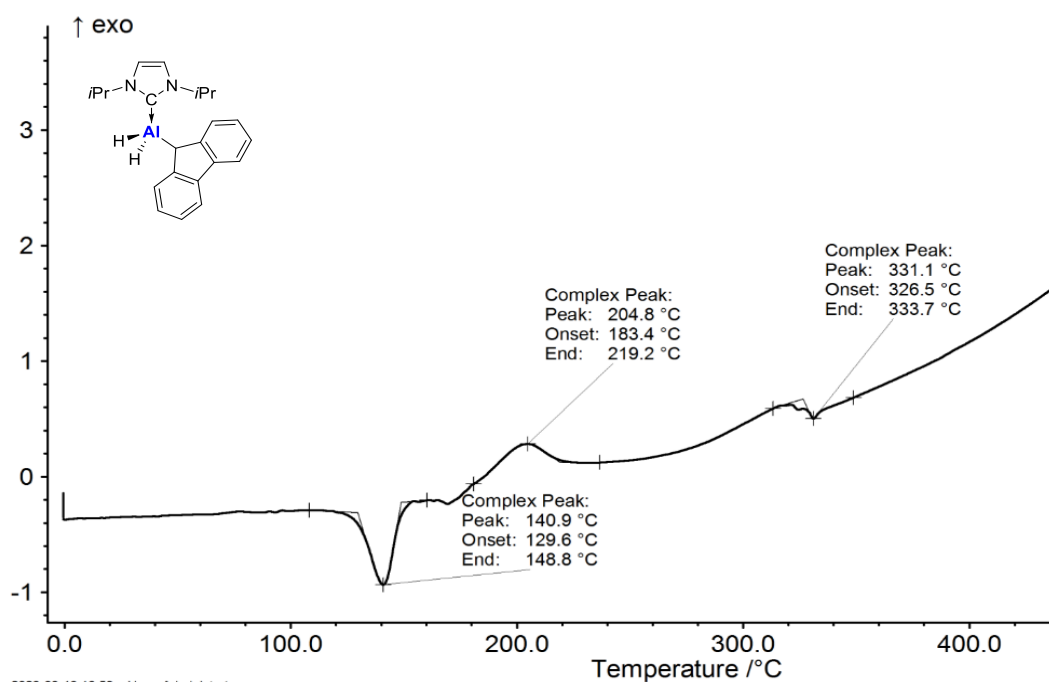

Figure S65. DSC curve of  $(iPr) \cdot AlH_2FI$  5

DSC /(mW/mg)

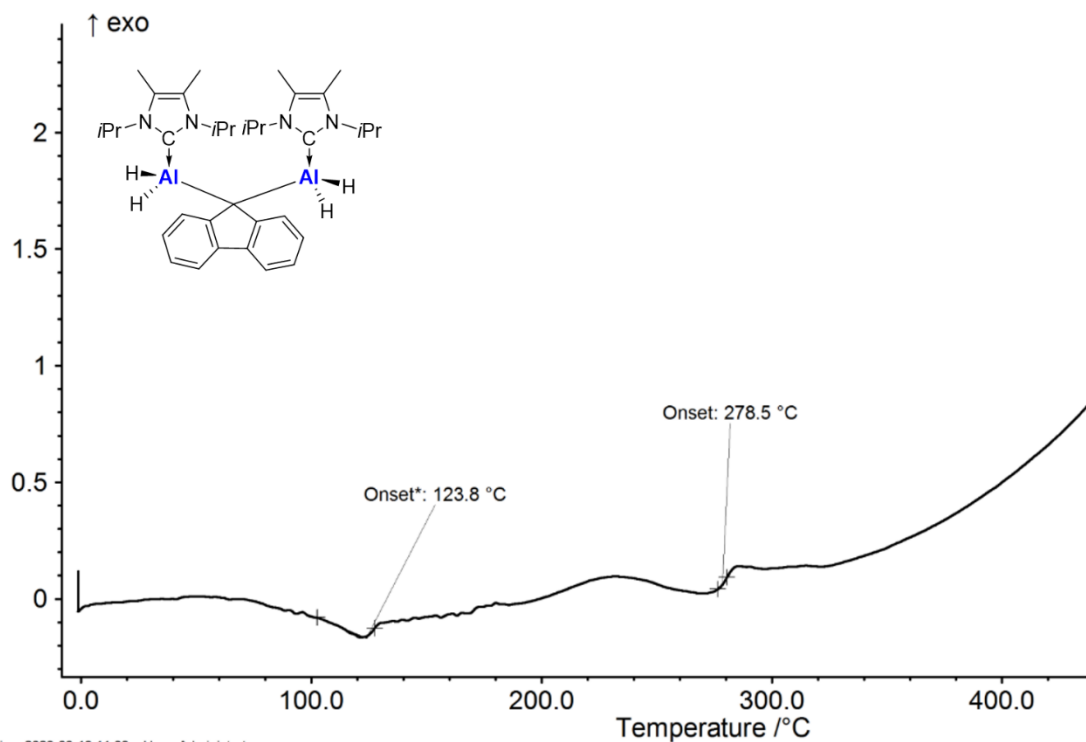

Figure S66. DSC curve of  $\{(iPr)^{Me}_2AlH\}_2-\mu\text{-FI}$  19

DSC /(mW/mg)

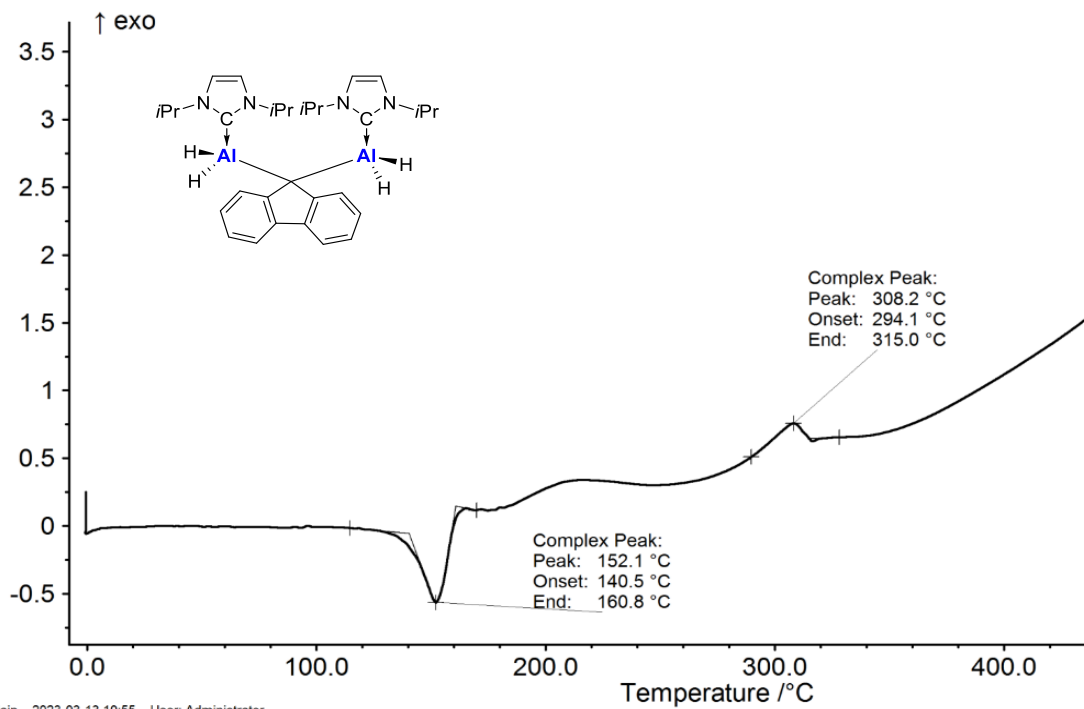

Figure S67. DSC curve of  $\{(iPr)AlH_2\}_2-\mu\text{-FI}$  20

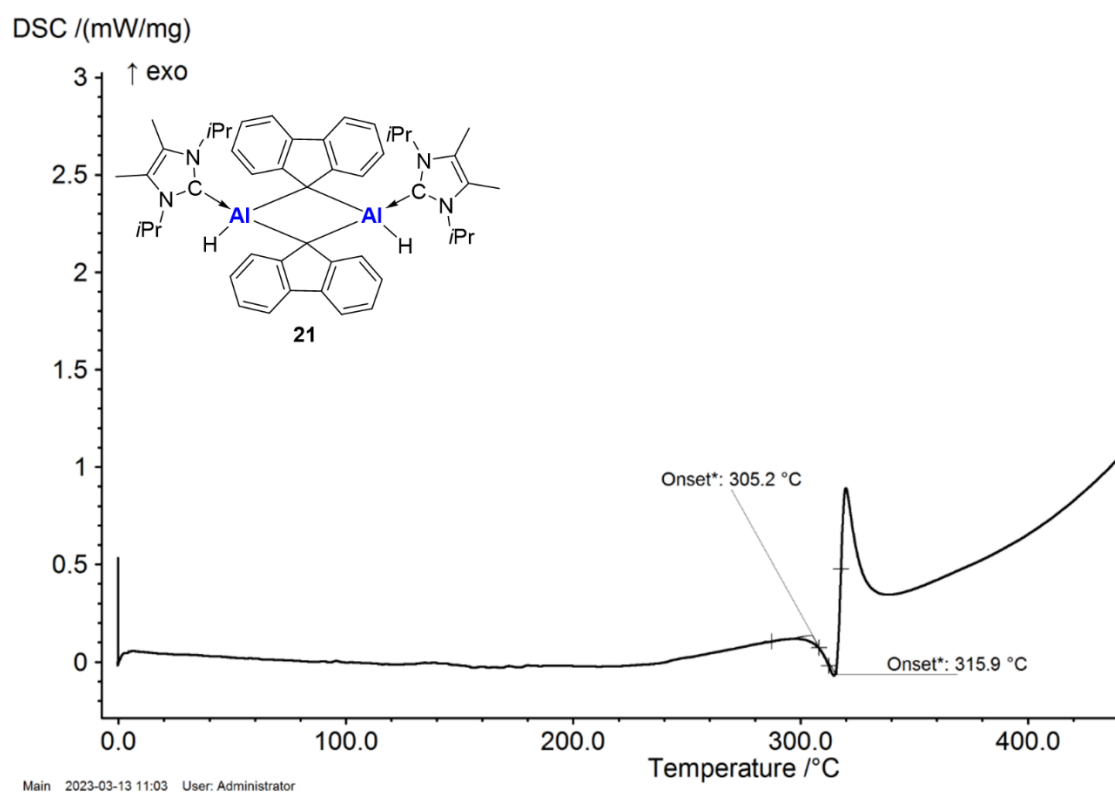

**Figure S67.** DSC curve of  $\{(iPr)_2AlH_2\}_2-\mu\text{-Fl}$  **20**

### 3) Crystal data collection and processing parameters

Crystal data collection and processing parameters are given in Table S11. Crystals were immersed in a film of perfluoropolyether oil on a glass fiber MicroMount™ (MiTeGen) and transferred to a Bruker D8 Apex-1 diffractometer with CCD area detector and graphite-monochromated Mo-K $\alpha$  radiation or a Bruker D8 Apex-2 diffractometer with CCD area detector and graphite-monochromated Mo-K $\alpha$  radiation equipped with an Oxford Cryosystems low-temperature device or a Rigaku XtaLAB Synergy-DW diffractometer with HyPix-6000HE detector and monochromated Cu-K $\alpha$  equipped with an Oxford Cryo 800 cooling unit. Data were collected at 100 K. The images were processed with the Bruker or CrysAlis software packages and equivalent reflections were merged. Corrections for Lorentz-polarization effects and absorption were performed if necessary and the structures were solved by direct methods. Subsequent difference Fourier syntheses revealed the positions of all other non-hydrogen atoms. The structures were solved by using the ShelXTL software package.<sup>[S2]</sup> All non-hydrogen atoms were refined anisotropically. Hydrogen atoms were usually assigned to idealized positions and were included in structure factors calculations.

**Table S1** Crystallographic data

|                                                             | (iMe <sup>Me</sup> ) AlH <sub>2</sub> Ind (3) | (iPr <sup>Me</sup> ) AlH <sub>2</sub> FI (4)     | (iPr) AlH <sub>2</sub> FI (5)                    |
|-------------------------------------------------------------|-----------------------------------------------|--------------------------------------------------|--------------------------------------------------|
| Chemical formula                                            | C <sub>16</sub> H <sub>21</sub> AlN           | C <sub>37</sub> H <sub>41</sub> AlN <sub>2</sub> | C <sub>22</sub> H <sub>27</sub> AlN <sub>2</sub> |
| Formula Mass [g·mol <sup>-1</sup> ]                         | 268.33                                        | 540.70                                           | 346.45                                           |
| Temperature [K]                                             | 100(2)                                        | 100(2)                                           | 100(2)                                           |
| Wavelength [Å]                                              | 1.54184                                       | 1.54184                                          | 1.54184                                          |
| Crystal system                                              | Triclinic                                     | Monoclinic                                       | Monoclinic                                       |
| Space group                                                 | P-1                                           | P2 <sub>1</sub> /n                               | P2 <sub>1</sub> /c                               |
| <i>a</i> [Å]                                                | 8.3243(2)                                     | 15.98870(10)                                     | 13.0917(2)                                       |
| <i>b</i> [Å]                                                | 9.3597(3)                                     | 10.23650(10)                                     | 8.51850(10)                                      |
| <i>c</i> [Å]                                                | 10.9459(3)                                    | 19.4053(2)                                       | 19.1232(3)                                       |
| $\alpha$ [°]                                                | 110.610(2)                                    | 90                                               | 90                                               |
| $\beta$ [°]                                                 | 100.206(2)                                    | 108.3190(10)                                     | 108.315(2)                                       |
| $\gamma$ [°]                                                | 103.225(2)                                    | 90                                               | 90                                               |
| Unit cell volume [Å <sup>3</sup> ]                          | 745.34(4)                                     | 3015.07(5)                                       | 2024.62(5)                                       |
| No. of formula units per unit cell                          | 2                                             | 4                                                | 4                                                |
| Density (calc) [g·cm <sup>-3</sup> ]                        | 1.196                                         | 1.191                                            | 1.137                                            |
| Absorption coefficient [mm <sup>-1</sup> ]                  | 1.078                                         | 0.785                                            | 0.901                                            |
| <i>F</i> (000)                                              | 288                                           | 1160                                             | 744                                              |
| Theta range $\vartheta$ [°]                                 | 4.499 to 77.571                               | 3.137 to 77.717                                  | 3.556 to 77.557                                  |
| Reflections collected                                       | 14601                                         | 115315                                           | 39939                                            |
| Independent reflections                                     | 3083                                          | 6386                                             | 4270                                             |
| Completeness to theta [%]                                   | 99.4                                          | 100                                              | 99.9                                             |
| <i>R</i> <sub>int</sub>                                     | 0.0429                                        | 0.0434                                           | 0.0524                                           |
| Data                                                        | 3083                                          | 6386                                             | 4270                                             |
| Restraints                                                  | 0                                             | 0                                                | 0                                                |
| Parameter                                                   | 184                                           | 375                                              | 238                                              |
| <i>R</i> 1 und <i>wR</i> 2 for [ <i>I</i> > 2σ( <i>I</i> )] | 0.0433, 0.1143                                | 0.0367, 0.0934                                   | 0.0449, 0.1283                                   |
| <i>R</i> 1 und <i>wR</i> 2 (all data)                       | 0.0489, 0.1181                                | 0.0391, 0.0952                                   | 0.0490, 0.1325                                   |
| Largest diff. peak and hole [eÅ <sup>-3</sup> ]             | 0.443 / -0.262                                | 0.267 / -0.250                                   | 0.558 / -0.346                                   |
| Goof                                                        | 1.055                                         | 1.063                                            | 1.078                                            |
| CCDC number                                                 | 2328368                                       | 2328362                                          | 2328365                                          |

|                                                                      | <b>(IME<sup>Me</sup>) AlH<sub>2</sub>FI (6)</b>  | <b>(IiPr) GaH<sub>2</sub>Ind (8)</b>             | <b>(IiPr) GaH<sub>2</sub>FI (11)</b>             |
|----------------------------------------------------------------------|--------------------------------------------------|--------------------------------------------------|--------------------------------------------------|
| Chemical formula                                                     | C <sub>20</sub> H <sub>23</sub> AlN <sub>2</sub> | C <sub>18</sub> H <sub>25</sub> GaN <sub>2</sub> | C <sub>22</sub> H <sub>27</sub> GaN <sub>2</sub> |
| Formula Mass [g·mol <sup>-1</sup> ]                                  | 318.38                                           | 339.12                                           | 389.17                                           |
| Temperature [K]                                                      | 100(2)                                           | 100(2)                                           | 100(2)                                           |
| Wavelength [Å]                                                       | 1.54184                                          | 1.54184                                          | 1.54184                                          |
| Crystal system                                                       | Orthorhombic                                     | Orthorhombic                                     | Monoclinic                                       |
| Space group                                                          | P2 <sub>1</sub> 2 <sub>1</sub> 2 <sub>1</sub>    | Pbca                                             | P2 <sub>1</sub> /c                               |
| <i>a</i> [Å]                                                         | 8.4966(2)                                        | 12.3946(2)                                       | 13.0769(5)                                       |
| <i>b</i> [Å]                                                         | 13.6726(3)                                       | 16.3096(2)                                       | 8.4982(2)                                        |
| <i>c</i> [Å]                                                         | 15.2417(3)                                       | 33.9295(5)                                       | 19.2047(8)                                       |
| $\alpha$ [°]                                                         | 90                                               | 90                                               | 90                                               |
| $\beta$ [°]                                                          | 90                                               | 90                                               | 108.432(4)                                       |
| $\gamma$ [°]                                                         | 90                                               | 90                                               | 90                                               |
| Unit cell volume [Å <sup>3</sup> ]                                   | 1770.64(7)                                       | 6858.88(17)                                      | 2024.73(13)                                      |
| No. of formula units per unit cell                                   | 4                                                | 16                                               | 4                                                |
| Density (calc) [g·cm <sup>-3</sup> ]                                 | 11.194                                           | 1.314                                            | 1.277                                            |
| Absorption coefficient [mm <sup>-1</sup> ]                           | 0.989                                            | 2.139                                            | 1.365                                            |
| <i>F</i> (000)                                                       | 680                                              | 2848                                             | 816                                              |
| Theta range $\vartheta$ [°]                                          | 4.344 to 77.485                                  | 2.605 to 73.952                                  | 2.236 to 31.097                                  |
| Reflections collected                                                | 10475                                            | 47453                                            | 24227                                            |
| Independent reflections                                              | 3464                                             | 6884                                             | 5348                                             |
| Completeness to theta [%]                                            | 99.9                                             | 99.8                                             | 100                                              |
| <i>R</i> <sub>int</sub>                                              | 0.0404                                           | 0.0399                                           | 0.0388                                           |
| Data                                                                 | 3464                                             | 6884                                             | 5348                                             |
| Restraints                                                           | 0                                                | 0                                                | 0                                                |
| Parameter                                                            | 220                                              | 403                                              | 238                                              |
| <i>R</i> 1 und <i>wR</i> 2 for [ <i>I</i> > 2 $\sigma$ ( <i>I</i> )] | 0.0358, 0.0909                                   | 0.0384, 0.041                                    | 0.0317, 0.0674                                   |
| <i>R</i> 1 und <i>wR</i> 2 (all data)                                | 0.0385, 0.0927                                   | 0.0518, 0.1007                                   | 0.0475, 0.0714                                   |
| Largest diff. peak and hole [eÅ <sup>-3</sup> ]                      | 0.175 / -0.296                                   | 1.080 / -0.665                                   | 0.401 / -0.308                                   |
| Goof                                                                 | 1.066                                            | 1.021                                            | 1.049                                            |
| CCDC number                                                          | 2328363                                          | 2328357                                          | 2328366                                          |

|                                                                      | <b>(iMe<sup>Me</sup>) GaH<sub>2</sub>FI (12)</b> | <b>(iPr) AlHInd<sub>2</sub> (14)</b>             | <b>(iMe<sup>Me</sup>) AlHInd<sub>2</sub> (15)</b> |
|----------------------------------------------------------------------|--------------------------------------------------|--------------------------------------------------|---------------------------------------------------|
| Chemical formula                                                     | C <sub>20</sub> H <sub>23</sub> GaN <sub>2</sub> | C <sub>27</sub> H <sub>31</sub> AlN <sub>2</sub> | C <sub>25</sub> H <sub>27</sub> AlN <sub>2</sub>  |
| Formula Mass [g·mol <sup>-1</sup> ]                                  | 361.12                                           | 410.52                                           | 382.46                                            |
| Temperature [K]                                                      | 100(2)                                           | 100.(2)                                          | 100(2)                                            |
| Wavelength [Å]                                                       | 1.54184                                          | 1.54184                                          | 1.54184                                           |
| Crystal system                                                       | Orthorhombic                                     | Monoclinic                                       | Monoclinic                                        |
| Space group                                                          | P2 <sub>1</sub> 2 <sub>1</sub> 2 <sub>1</sub>    | P2 <sub>1</sub> /c                               | P2 <sub>1</sub> /n                                |
| <i>a</i> [Å]                                                         | 8.4828(2)                                        | 8.6951(2)                                        | 12.2976(2)                                        |
| <i>b</i> [Å]                                                         | 13.6588(5)                                       | 12.8561(2)                                       | 11.66710(10)                                      |
| <i>c</i> [Å]                                                         | 15.2488(5)                                       | 20.8697(3)                                       | 15.7205(2)                                        |
| $\alpha$ [°]                                                         | 90                                               | 90                                               | 90                                                |
| $\beta$ [°]                                                          | 90                                               | 101.996(2)                                       | 107.158(2)                                        |
| $\gamma$ [°]                                                         | 90                                               | 90                                               | 90                                                |
| Unit cell volume [Å <sup>3</sup> ]                                   | 1766.80(10)                                      | 2281.97(7)                                       | 2155.15(5)                                        |
| No. of formula units per unit cell                                   | 4                                                | 4                                                | 4                                                 |
| Density (calc) [g·cm <sup>-3</sup> ]                                 | 1.358                                            | 1.195                                            | 1.179                                             |
| Absorption coefficient [mm <sup>-1</sup> ]                           | 2.117                                            | 0.879                                            | 0.897                                             |
| <i>F</i> (000)                                                       | 752                                              | 880                                              | 816                                               |
| Theta range $\vartheta$ [°]                                          | 4.346 to 77.906                                  | 4.064 to 80.346                                  | 4.035 to 79.834                                   |
| Reflections collected                                                | 10282                                            | 13412                                            | 22682                                             |
| Independent reflections                                              | 3486                                             | 4614                                             | 4602                                              |
| Completeness to theta [%]                                            | 99.9                                             | 96.2                                             | 100                                               |
| <i>R</i> <sub>int</sub>                                              | 0.0444                                           | 0.0460                                           | 0.0378                                            |
| Data                                                                 | 3486                                             | 4614                                             | 4602                                              |
| Restraints                                                           | 0                                                | 0                                                | 281                                               |
| Parameter                                                            | 218                                              | 279                                              | 346                                               |
| <i>R</i> 1 und <i>wR</i> 2 for [ <i>I</i> > 2 $\sigma$ ( <i>I</i> )] | 0.0380, 0.0961                                   | 0.0434, 0.1083                                   | 0.0403, 0.1046                                    |
| <i>R</i> 1 und <i>wR</i> 2 (all data)                                | 0.0400, 0.0971                                   | 0.0539, 0.1142                                   | 0.0444, 0.1070                                    |
| Largest diff. peak and hole [eÅ <sup>-3</sup> ]                      | 0.607 / -0.461                                   | 0.258 / -0.302                                   | 0.270 / -0.252                                    |
| Goof                                                                 | 1.079                                            | 1.070                                            | 1.047                                             |
| CCDC number                                                          | 2328355                                          | 2328370                                          | 2328360                                           |



|                                                                      | <b>(<i>i</i>Pr<sup>Me</sup>) AlHfI<sub>2</sub> (16)</b> | <b>(<i>i</i>Me<sup>Me</sup>) AlHfI<sub>2</sub> (18)</b> | <b>{(<i>i</i>Pr<sup>Me</sup>) AlH<sub>2</sub>}<sub>2</sub>-FI (19)</b> |
|----------------------------------------------------------------------|---------------------------------------------------------|---------------------------------------------------------|------------------------------------------------------------------------|
| Chemical formula                                                     | C <sub>43</sub> H <sub>45</sub> AlN <sub>2</sub>        | C <sub>33</sub> H <sub>31</sub> AlN <sub>2</sub>        | C <sub>35</sub> H <sub>52</sub> Al <sub>2</sub> N <sub>4</sub>         |
| Formula Mass [g·mol <sup>-1</sup> ]                                  | 616.79                                                  | 482.58                                                  | 582.76                                                                 |
| Temperature [K]                                                      | 100(2)                                                  | 100(2)                                                  | 100(2)                                                                 |
| Wavelength [Å]                                                       | 1.54184                                                 | 1.54184                                                 | 1.54184                                                                |
| Crystal system                                                       | Triclinic                                               | Triclinic                                               | Monoclinic                                                             |
| Space group                                                          | P1                                                      | P-1                                                     | I2/a                                                                   |
| <i>a</i> [Å]                                                         | 9.7049(2)                                               | 12.14390(10)                                            | 17.5752(3)                                                             |
| <i>b</i> [Å]                                                         | 10.1111(2)                                              | 13.0413(2)                                              | 10.5232(2)                                                             |
| <i>c</i> [Å]                                                         | 10.2297(2)                                              | 16.6824(2)                                              | 38.6355(8)                                                             |
| $\alpha$ [°]                                                         | 96.7320(10)                                             | 82.0080(10)                                             | 90                                                                     |
| $\beta$ [°]                                                          | 103.215(2)                                              | 88.6270(10)                                             | 98.272(2)                                                              |
| $\gamma$ [°]                                                         | 114.685(2)                                              | 84.5490(10)                                             | 90                                                                     |
| Unit cell volume [Å <sup>3</sup> ]                                   | 861.88(3)                                               | 2604.38(6)                                              | 7071.2(2)                                                              |
| No. of formula units per unit cell                                   | 1                                                       | 4                                                       | 8                                                                      |
| Density (calc) [g·cm <sup>-3</sup> ]                                 | 1.188                                                   | 1.231                                                   | 1.095                                                                  |
| Absorption coefficient [mm <sup>-1</sup> ]                           | 0.750                                                   | 0.853                                                   | 0.940                                                                  |
| <i>F</i> (000)                                                       | 330                                                     | 1024                                                    | 2528                                                                   |
| Theta range $\vartheta$ [°]                                          | 4.574 to 77.034                                         | 2.675 to 77.701                                         | 2.311 to 74.325                                                        |
| Reflections collected                                                | 18147                                                   | 53139                                                   | 37833                                                                  |
| Independent reflections                                              | 5069                                                    | 10928                                                   | 7062                                                                   |
| Completeness to theta [%]                                            | 99.8                                                    | 100                                                     | 99.8                                                                   |
| <i>R</i> <sub>int</sub>                                              | 0.0258                                                  | 0.0426                                                  | 0.0307                                                                 |
| Data                                                                 | 5096                                                    | 10928                                                   | 7062                                                                   |
| Restraints                                                           | 3                                                       | 0                                                       | 0                                                                      |
| Parameter                                                            | 425                                                     | 665                                                     | 398                                                                    |
| <i>R</i> 1 und <i>wR</i> 2 for [ <i>I</i> > 2 $\sigma$ ( <i>I</i> )] | 0.0278, 0.0739                                          | 0.0386, 0.0957                                          | 0.0545, 0.1298                                                         |
| <i>R</i> 1 und <i>wR</i> 2 (all data)                                | 0.0282, 0.0743                                          | 0.0442, 0.0991                                          | 0.0654, 0.1359                                                         |
| Largest diff. peak and hole [eÅ <sup>-3</sup> ]                      | 0.191 / -0.208                                          | 0.304 / -0.270                                          | 0.700 / -0.285                                                         |
| Goof                                                                 | 1.036                                                   | 1.022                                                   | 1.073                                                                  |
| CCDC number                                                          | 2328364                                                 | 2328358                                                 | 2328361                                                                |

|                                                                      | <b>{(iPr) AlH<sub>2</sub>}<sub>2</sub>-Fl (20)</b>             | <b>{(iPr<sup>Me</sup>) AlHFl}<sub>2</sub> (21)</b>             | <b>{(iPr<sup>Me</sup>) AlHInd}<sub>2</sub> (22)</b>            |
|----------------------------------------------------------------------|----------------------------------------------------------------|----------------------------------------------------------------|----------------------------------------------------------------|
| Chemical formula                                                     | C <sub>31</sub> H <sub>44</sub> Al <sub>2</sub> N <sub>4</sub> | C <sub>48</sub> H <sub>58</sub> Al <sub>2</sub> N <sub>4</sub> | C <sub>43</sub> H <sub>61</sub> Al <sub>2</sub> N <sub>4</sub> |
| Formula Mass [g·mol <sup>-1</sup> ]                                  | 526.66                                                         | 744.94                                                         | 687.91                                                         |
| Temperature [K]                                                      | 100(2)                                                         | 100(2)                                                         | 100(2)                                                         |
| Wavelength [Å]                                                       | 1.54184                                                        | 1.54184                                                        | 1.54184                                                        |
| Crystal system                                                       | Monoclinic                                                     | Monoclinic                                                     | Monoclinic                                                     |
| Space group                                                          | P2 <sub>1</sub> /c                                             | P2 <sub>1</sub> /c                                             | P2 <sub>1</sub> /n                                             |
| <i>a</i> [Å]                                                         | 19.1995(5)                                                     | 12.6278(2)                                                     | 13.53080(10)                                                   |
| <i>b</i> [Å]                                                         | 10.24520(10)                                                   | 16.1570(2)                                                     | 14.21250(10)                                                   |
| <i>c</i> [Å]                                                         | 17.0700(3)                                                     | 21.6852(4)                                                     | 21.8135(2)                                                     |
| $\alpha$ [°]                                                         | 90                                                             | 90                                                             | 90                                                             |
| $\beta$ [°]                                                          | 114.130(3)                                                     | 106.420(2)                                                     | 97.1080(10)                                                    |
| $\gamma$ [°]                                                         | 90                                                             | 90                                                             | 90                                                             |
| Unit cell volume [Å <sup>3</sup> ]                                   | 3064.32(12)                                                    | 4243.93(12)                                                    | 4162.64(6)                                                     |
| No. of formula units per unit cell                                   | 4                                                              | 4                                                              | 4                                                              |
| Density (calc) [g·cm <sup>-3</sup> ]                                 | 1.142                                                          | 1.166                                                          | 1.098                                                          |
| Absorption coefficient [mm <sup>-1</sup> ]                           | 1.037                                                          | 0.894                                                          | 0.868                                                          |
| <i>F</i> (000)                                                       | 1136                                                           | 1600                                                           | 1492                                                           |
| Theta range $\vartheta$ [°]                                          | 5.001 to 67.078                                                | 3.464 to 77.656                                                | 3.653 to 80.074                                                |
| Reflections collected                                                | 16241                                                          | 23665                                                          | 43459                                                          |
| Independent reflections                                              | 5253                                                           | 8214                                                           | 8875                                                           |
| Completeness to theta [%]                                            | 96                                                             | 96                                                             | 99.8                                                           |
| <i>R</i> <sub>int</sub>                                              | 0.0398                                                         | 0.0267                                                         | 0.0836                                                         |
| Data                                                                 | 5253                                                           | 8214                                                           | 8875                                                           |
| Restraints                                                           | 0                                                              | 0                                                              | 0                                                              |
| Parameter                                                            | 358                                                            | 507                                                            | 463                                                            |
| <i>R</i> 1 und <i>wR</i> 2 for [ <i>I</i> > 2 $\sigma$ ( <i>I</i> )] | 0.0548, 0.1540                                                 | 0.0400, 0.1063                                                 | 0.0555, 0.1538                                                 |
| <i>R</i> 1 und <i>wR</i> 2 (all data)                                | 0.0728, 0.1661                                                 | 0.0479, 0.1117                                                 | 0.0594, 0.1579                                                 |
| Largest diff. peak and hole [eÅ <sup>-3</sup> ]                      | 0.501 / -0.407                                                 | 0.395 / -0.303                                                 | 1.087 / -0.464                                                 |
| Goof                                                                 | 1.055                                                          | 1.065                                                          | 1.066                                                          |
| CCDC number                                                          | 2328369                                                        | 2328367                                                        | 2328356                                                        |

---

| <b>{(IMe<sup>Me</sup>) AlHInd}<sub>3</sub> (23)</b>                               |                                                                |
|-----------------------------------------------------------------------------------|----------------------------------------------------------------|
| Chemical formula                                                                  | C <sub>55</sub> H <sub>65</sub> Al <sub>3</sub> N <sub>6</sub> |
| Formula Mass [g·mol <sup>-1</sup> ]                                               | 891.07                                                         |
| Temperature [K]                                                                   | 100(2)                                                         |
| Wavelength [Å]                                                                    | 1.54184                                                        |
| Crystal system                                                                    | Triclinic                                                      |
| Space group                                                                       | P-1                                                            |
| <i>a</i> [Å]                                                                      | 8.3610(2)                                                      |
| <i>b</i> [Å]                                                                      | 16.6235(5)                                                     |
| <i>c</i> [Å]                                                                      | 18.8508(4)                                                     |
| $\alpha$ [°]                                                                      | 100.766(2)                                                     |
| $\beta$ [°]                                                                       | 99.620(2)                                                      |
| $\gamma$ [°]                                                                      | 92.091(2)                                                      |
| Unit cell volume [Å <sup>3</sup> ]                                                | 2531.53(11)                                                    |
| No. of formula units per unit cell                                                | 2                                                              |
| Density (calc) [g·cm <sup>-3</sup> ]                                              | 1.169                                                          |
| Absorption coefficient [mm <sup>-1</sup> ]                                        | 1.002                                                          |
| <i>F</i> (000)                                                                    | 952                                                            |
| Theta range $\vartheta$ [°]                                                       | 2.712 to 80.172                                                |
| Reflections collected                                                             | 40506                                                          |
| Independent reflections                                                           | 10540                                                          |
| Completeness to theta [%]                                                         | 98.6                                                           |
| <i>R</i> <sub>int</sub>                                                           | 0.1009                                                         |
| Data                                                                              | 10540                                                          |
| Restraints                                                                        | 79                                                             |
| Parameter                                                                         | 628                                                            |
| <i>R</i> <sub>1</sub> und <i>wR</i> <sub>2</sub> for [ <i>I</i> > 2σ( <i>I</i> )] | 0.0884, 0.2099                                                 |
| <i>R</i> <sub>1</sub> und <i>wR</i> <sub>2</sub> (all data)                       | 0.1185, 0.2249                                                 |
| Largest diff. peak and hole [eÅ <sup>-3</sup> ]                                   | 0.741 / -0.547                                                 |
| Goof                                                                              | 1.093                                                          |
| CCDC number                                                                       | 2328359                                                        |

---

## References:

- [S1] For a discussion of these equilibria for cyclopentadienyl compounds see: L. Werner, S. Mann, Udo Radius, *Eur. J. Inorg. Chem.* 2023, e202300398
- [S2] G. M. Sheldrick, *Acta Crystallogr., Sect. A: Found. Adv* 2014, **70**, C1437.
